# 1 Inflammatory Bowel Disease Drivers Revealed in Human Organ Chips

2  
3 Alican Özkan<sup>1</sup>, Gwenn Merry<sup>1</sup>, David B. Chou<sup>1,2</sup>, Ryan R. Posey<sup>1</sup>, Anna Stejskalova<sup>1</sup>, Karina  
4 Calderon<sup>1</sup>, Megan Sperry<sup>1</sup>, Viktor Horvath<sup>1,10</sup>, Lorenzo E. Ferri<sup>3,4</sup>, Emanuela Carlotti<sup>5</sup>, Stuart A.  
5 C. McDonald<sup>5</sup>, Douglas J. Winton<sup>6</sup>, Rocco Riccardi<sup>7</sup>, Lilianna Bordeianou<sup>7</sup>, Sean Hall<sup>1,11</sup>, Girija  
6 Goyal<sup>1</sup>, Donald E. Ingber<sup>1,8,9,\*</sup>

7  
8 <sup>1</sup> Wyss Institute for Biologically Inspired Engineering at Harvard University, Boston, MA

9 <sup>2</sup> Department of Pathology, Massachusetts General Hospital, Boston, MA

10 <sup>3</sup> Thoracic and Upper GI Cancer Research Laboratories, Research Institute of McGill University  
11 Health Centre, Montreal, QC, Canada

12 <sup>4</sup> Department of Experimental Surgery and Department of Surgery, McGill University, Montreal,  
13 QC, Canada

14 <sup>5</sup> Clonal Dynamics in Epithelia Laboratory, Queen Mary University of London, London, United  
15 Kingdom

16 <sup>6</sup> Cancer Research UK Cambridge Institute, Li Ka Shing Centre, Cambridge, United Kingdom

17 <sup>7</sup> Department of Surgery, Massachusetts General Hospital, Boston, MA

18 <sup>8</sup> Vascular Biology Program and Department of Surgery, Boston Children's Hospital and  
19 Harvard Medical School, Boston, MA

20 <sup>9</sup> Harvard John A. Paulson School of Engineering and Applied Sciences, Cambridge, MA

21 <sup>10</sup> Current address: Entact Bio, Watertown, MA

22 <sup>11</sup> Current address: Iovance Therapeutics, Tampa, FL

23  
24 \*Address correspondence to: Donald E. Ingber, MD, PhD  
25 201 Brookline Ave., Suite 401, Boston MA, 02215, USA  
26 em: [don.ingber@wyss.harvard.edu](mailto:don.ingber@wyss.harvard.edu)

27  
28 Keywords: Organ-on-a-chip, Ulcerative Colitis, Crohn's Disease, Inflammation, Cancer,  
29 Carcinogenesis, Epithelial-Stromal Interactions, Women's health

30

31

## 32 **Abstract**

33 **Inflammatory bowel disease (IBD) patients exhibit compromised intestinal barrier**  
34 **function and decreased mucus accumulation, as well as increased inflammation,**  
35 **fibrosis, and cancer risk, with symptoms often being exacerbated in women during**  
36 **pregnancy. Here, we show that these IBD hallmarks can be replicated using human**  
37 **Organ Chips lined by IBD patient-derived colon epithelial cells interfaced with matched**  
38 **fibroblasts cultured under flow. Use of heterotypic tissue recombinants revealed that IBD**  
39 **fibroblasts are the primary drivers of multiple IBD symptoms. Inflammation and fibrosis**  
40 **are accentuated by peristalsis-like motions in IBD Chips and when exposed to**  
41 **pregnancy-associated hormones in female IBD Chips. Carcinogen exposure also**  
42 **increases inflammation, gene mutations, and chromosome duplication in IBD Chips, but**  
43 **not in Healthy Chips. These data enabled by human Organ Chip technology suggest that**  
44 **the intestinal stroma and peristalsis-associated mechanical deformations play a key role**  
45 **in driving inflammation and disease progression in male and female IBD patients.**

46

---

## 47 **Main**

48 Inflammation of the intestinal mucosa, including enhanced production of inflammatory cytokines  
49 and tissue infiltration with immune cells, along with increased barrier permeability, thinning of  
50 the protective mucus layer, and fibrosis are central hallmarks of inflammatory bowel diseases  
51 (IBD), such as Crohn's disease (Crohn's) and ulcerative colitis (UC). These alterations lead to  
52 significant digestive issues and an increased risk of developing colorectal cancer<sup>1</sup>. IBD  
53 symptoms also can be more prominent in women<sup>2</sup> and they have to control their symptoms  
54 before pregnancy because exacerbations increase the risk of preterm birth<sup>3</sup>. Most IBD  
55 treatments target immune cells rather than intestinal tissues, and treatment efficacy is variable  
56 among patients<sup>4</sup>. However, interactions between epithelia and underlying stroma also may

57 contribute to inflammation as well as cancer progression<sup>5</sup>. For example, the presence of a  
58 subset of fibroblasts that recruit immune cells to the intestinal stem cell niche is associated with  
59 poor prognosis in patients with colorectal cancer<sup>6</sup>. Inflamed epithelial cells also can undergo an  
60 epithelial-to-mesenchymal transition and increase deposition of extracellular matrix (ECM)  
61 resulting in intestinal fibrosis that leads to complications, such as bowel stiffening and restriction  
62 of lumenal fluid flow, which further exacerbate digestive problems in IBD patients<sup>7,8</sup>. Thus, there  
63 is a need to gain greater insight into how epithelial-stromal interactions, peristalsis, and fluid  
64 flow influence IBD development in both male and female patients. However, animal IBD models  
65 and in vitro studies with human intestinal cell lines lack direct relevance to the human disease<sup>9</sup>,  
66 and human intestinal organoids cannot be used to address these questions because they lack  
67 an epithelial-stromal interface, mucosal barrier, fluid flow, peristalsis motions, and immune cells,  
68 which are critical organ-level features required to address these questions.

69 Here, we leveraged human organ-on-a-chip (Organ Chip) microfluidic culture technology  
70 that recreates tissue-tissue interfaces and a physiologically relevant intestinal microenvironment  
71 including dynamic fluid flow, peristalsis-like mechanical deformations, and circulating immune  
72 cells to confront this challenge<sup>10,11</sup>. Colon Chips lined by human organoid-derived colonic  
73 epithelium cultured under dynamic fluid flow have been successfully used in the past to study  
74 mucus layer accumulation and physiology<sup>12,13</sup> as well as to identify microbiome metabolites that  
75 influence host response to bacterial infections<sup>14</sup>. In this study, we isolated epithelium and  
76 stromal-derived fibroblasts from the same regions of colon from healthy or IBD patients and  
77 used them to create Colon Chips that contained an epithelial-fibroblast interface. We also  
78 created heterotypic tissue recombinant chips, measured the effects of applying peristalsis-like  
79 motions and flowing immune cells through the stromal channel, and studied the effects of  
80 female hormones on the IBD state, in addition to modeling cancer progression exposing the  
81 Colon Chips to carcinogens in vitro.

82

## 83 Results

### 84 Establishment of Human Healthy and IBD Colon Chips

85 Patient-specific epithelial organoids and stromal fibroblasts were isolated from surgical  
86 biopsies of the sigmoid colon of healthy and IBD patients with Crohn's or UC (**Extended Data**  
87 **Fig. 1A** and **Supplementary Information**) and the organoids were expanded in Matrigel  
88 cultures while the fibroblasts were cultured on plastic dishes (**Extended Data Fig. 1B**). To build  
89 the human Colon Chips, the primary colon epithelial cells and fibroblasts were respectively  
90 seeded on the top and bottom surfaces of a porous ECM-coated membrane that separates two  
91 parallel channels within a commercially available microfluidic Organ Chip (**Fig. 1A**). The cells  
92 were allowed to adhere under static conditions for 1 day before flow was initiated. A continuous  
93 epithelial monolayer with undulating crypt-like structures formed by 11 days in Healthy Chips  
94 when viewed from above (**Fig. 1B,C**) or in cross sections (**Fig. 1D,E**). The epithelium became  
95 progressively obscured by dense opaque deposits from day 3 to 7, which completely filled the  
96 upper channel by day 11 (**Fig. 1C**). These opaque materials have been shown to be composed  
97 of mucus with similar composition, thickness, and bilayer structure as seen in human colonic  
98 mucus *in vivo*<sup>12,13</sup>. Similar chips lined with colonic epithelium and fibroblasts from Crohn's or UC  
99 patient samples also formed hill and crypt-like structures, but significantly but significantly less  
100 mucus accumulated on top of the epithelium, particularly in the UC chips (**Fig. 1C** and  
101 **Extended Data Fig. 1C**) and the heights of the intestinal epithelium were significantly reduced  
102 as well (**Fig. 1E**). Epithelial cells within both Healthy and IBD Chips also expressed colon-  
103 specific cytokeratin 20 along their apical borders, while the basal stem cell marker SOX9  
104 primarily appeared in their nuclei at the cell base (**Fig. 1F**), which is a hallmark of colon crypts *in*  
105 *vivo*<sup>23</sup>.

106 Past work has shown that there is a subset of stromal fibroblasts in IBD patients that  
107 have higher levels of expression of oncostatin M receptor (OSMR) and podoplanin (PDPN)<sup>6</sup>,  
108 which appear to play a significant role in inflammation, fibrosis, and cancer<sup>24</sup>. Indeed, when we

109 carried out flow cytometric analysis after removing stromal cells from the chips, we found that  
110 PDPN expression was significantly higher in IBD fibroblasts that expressed high OSMR levels  
111 (**Extended Data Fig. 2A,B**) and that fibroblasts in IBD Chips lined by cells from both Crohn's  
112 and UC patients secreted more inflammatory cytokines (e.g, IL6, IL8, MCP-1) from the basal  
113 channel than those in Healthy Chips (**Fig. 1G**). We also found that fibroblasts in IBD Chips  
114 established using both Crohn's and UC patients samples express higher vimentin and  $\alpha$ -SMA  
115 than healthy controls (**Extended Data Fig. 2C,D**), as previously observed in IBD mice models  
116 induced by treatment with DSS or IL10 knock out<sup>25</sup>.

117 Transcriptomic analysis of epithelial cells and fibroblasts individually within Healthy  
118 versus IBD Chips revealed that genes which were found to be overexpressed in Crohn's and  
119 UC (e.g., ADA2, APOBEC3B, GSPT2, CD40, ACAN, HLA-DQB1) epithelium on-chip were also  
120 expressed at higher levels compared to healthy epithelium (**Extended Data Fig. 3A,B**). In  
121 addition, genes suppressed in IBD patient tissues in vivo (e.g., MUC5B, FDFT1 in Crohn's and  
122 SOD3, SMIM32, APOBR in UC <sup>26-30</sup>) were expressed at lower levels by epithelium in both  
123 Crohn's and UC IBD Chips.

124 When stromal cells cultured in IBD Chips were similarly analyzed, they displayed  
125 expression of IBD-relevant genes with Crohn's fibroblasts overexpressing ITGA7, FXD1, HGF,  
126 FZD7, NKX2-3, LOXL3 relative to healthy fibroblasts, while high levels of IKBIP, NKX2-3, ADA2,  
127 ECM2, NDN, SLC22A17 were seen in UC fibroblasts (**Extended Data. Fig. 3C,D**). In contrast,  
128 other genes were downregulated in these fibroblasts including NLRP2, FUCA1, CLCA4, and  
129 RNF186 in Crohn's and RALGPS1, DLG3, STON2, and FMO5 in UC derived IBD Chips  
130 (**Extended Data Fig. 3C,D**), which is again consistent with results of transcriptomic analyses  
131 carried out on IBD patient tissues<sup>31-33</sup>.

132 Gene ontology and Reactome analysis revealed that multiple IBD-relevant biological  
133 processes, including increased ECM production and remodeling, cell adhesion, and  
134 angiogenesis as well as decreased metabolism were predominant in both Crohn's and UC

135 epithelium and fibroblasts on-chip, with UC tissues also exhibiting suppressed IL10 signaling  
136 (**Extended Data Fig. 4A-D**). These functional pathways are also activated or suppressed in a  
137 similar manner in IBD patients<sup>34</sup>.

### 138 **Peristalsis-Like Mechanical Motions Enhance IBD Progression**

139 IBD patients experience thinning of the protective mucus layer in their colon<sup>12</sup> and  
140 eventually loss of peristalsis as a consequence of increased fibrosis<sup>7,8</sup>, which further exacerbate  
141 their gastrointestinal symptoms. However, it is not known whether cyclic mechanical  
142 deformation of inflamed intestine or fluid flow due to peristalsis could influence IBD disease  
143 progression. To explore this possibility, we cultured Healthy and IBD Chips in the presence or  
144 absence of physiologically relevant cyclic deformations by applying suction to side chambers in  
145 the flexible devices. The healthy and IBD epithelia both accumulated a mucus layer when  
146 exposed to cyclic mechanical deformations were viewed by dark field imaging; however, the  
147 layer was much thinner in the IBD Chips (**Fig. 2A,B**). Transcriptomic analysis confirmed that the  
148 IBD Chips expressed lower levels of most mucins than Healthy Chips under all conditions, and  
149 that while expression of MUC-1,4,12,13,17,3A,5AC, and 5B increased in Healthy Chips  
150 exposed to mechanical strain, only MUC5AC and MUC13 increased in the IBD Chips (**Fig. 2C**).  
151 These data show that peristalsis-like mechanical deformations have a direct effect on mucus  
152 production in the colonic epithelium in both healthy and IBD Chips as fluid flow was constant  
153 under all conditions, and that the IBD epithelium is less effective at maintaining the normal  
154 thickness of the mucus layer in vitro as observed in IBD patients in vivo<sup>12,13</sup>.

155 Interestingly, second harmonic imaging of ECM fiber formation on-chip revealed that  
156 while both Crohn's and UC derived IBD fibroblasts accumulate comparable fibrillar collagen as  
157 healthy cells, these levels increase many fold when the IBD Chips are exposed to peristalsis-  
158 like motions whereas there is no change in Healthy Chips (**Fig. 2D,E**). Atomic force  
159 microscopic analysis carried out in parallel samples from the biopsies we used to isolate the  
160 patient-derived cells confirmed that this was associated with tissue stiffening (**Extended Data**

161 **Fig. 5A-D**). But while transcriptomic analysis showed that there is increased expression of  
162 collagen-associated genes in Crohn's and UC stroma on-chip without mechanical strain,  
163 exposure to peristalsis-like deformations did not result in significant changes in collagen gene  
164 expression (**Fig. 2F**), suggesting that the fibrotic changes we observed resulted from post-  
165 transcriptional alterations. Indeed, pathway analysis confirmed that biological processes  
166 associated with fibrosis per se (ECM organization, collagen formation and fibril organization)  
167 were upregulated in IBD Chips upon exposure to cyclic mechanical deformations (**Extended**  
168 **Fig. 6A**). In addition, our transcriptomic analysis revealed that expression of different  
169 cytochrome P450 subunits was suppressed in IBD versus Healthy Chips, which is consistent  
170 with the observation that the intestinal tissues of IBD patients experience decreased metabolic  
171 activities<sup>35,36</sup>. Importantly, while peristalsis-like cyclic deformations increased the expression of  
172 most of these metabolic genes in Healthy Chips, this response was not observed in IBD Chips  
173 (**Extended Data Fig. 6B**).

174 Peristalsis-like cyclic deformations also increased barrier function in both Healthy and  
175 IBD Chips; however, barrier leakiness always remained higher in IBD Chips (**Extended Data**  
176 **Fig. 7A**). Mechanical stimulation also enriched expression of inflammation associated genes in  
177 epithelial cells and fibroblasts in both Healthy and IBD Chips (**Fig. 2G**) and this was supported  
178 by transcriptomic analysis, which showed activation of the inflammatory response pathway in  
179 these cells (**Extended Data Fig. 7B**). Importantly, further pathway analysis of this transcriptomic  
180 dataset (**Extended Data Fig. 8**) demonstrated that peristalsis-like deformations activate  
181 pathways associated with IBD progression and exacerbation in the epithelium, including those  
182 involved in cancer, Toll-like receptor signaling, PPAR signaling, and focal adhesion in IBD  
183 epithelium (**Extended Data Fig. 9A**) as well as NOD-like receptor signaling, PDGF signaling,  
184 and cytokine-cytokine receptor interaction in IBD fibroblasts (**Extended Data Fig. 9B**). In  
185 contrast, these pathways that are known to exacerbate colitis in IBD patients<sup>37,38</sup> were not  
186 activated in Healthy Chips under the same mechanical stimulation conditions.

## 187 **Replicating Sex-Specific Clinical Symptoms of IBD Patients**

188           The gastrointestinal symptoms of female IBD patients become much more prominent  
189 during menstrual periods<sup>2</sup> and their therapies need to be optimized to control their symptoms  
190 before pregnancy due to increased risk to the fetus<sup>3</sup>. Yet, it is not known whether these  
191 responses are a direct effect of ovarian hormones on the intestine<sup>39</sup>. To address this question  
192 directly, we exposed healthy and IBD Chips lined by cells from female patients to estrogen (E2)  
193 and medroxyprogesterone acetate (MPA) to recapitulate the menstrual cycle or a mixture of  
194 pregnancy-associated hormones (E2, MPA, human chorionic gonadotropin, prolactin, and  
195 placental lactogen) to mimic the first trimester of pregnancy. Interestingly, exposure to E2, MPA  
196 or the pregnancy-associated hormone mixture decreased inflammatory cytokine and chemokine  
197 production in Healthy Chips whereas levels of these inflammatory molecules increased when  
198 IBD Chips were exposed to the same hormones (**Fig. 3A**). Moreover, addition of E2 and MPA  
199 increased fibrosis and exposure to the pregnancy-associated hormone mixture produced an  
200 even greater increase in fibrillar collagen deposition in the stroma of IBD Chips; however, this  
201 was not observed in Healthy Chips (**Fig. 3B,C**).

## 202 **Stromal Fibroblasts Control Barrier Permeability and Epithelial Inflammation**

203           To better understand the role of fibroblasts in IBD, we took advantage of the synthetic  
204 biology nature of human Organ Chip technology to create chips lined by heterotypic tissue  
205 recombinants of healthy epithelium with IBD stroma and vice versa. As expected, the homotypic  
206 cultures of IBD epithelium and stroma had a compromised barrier with higher permeability than  
207 healthy epithelium and stroma recombinants (**Fig. 4A**). However, we discovered that the  
208 presence of the IBD fibroblasts was the key driver of barrier disruption as permeability increased  
209 significantly when they were combined healthy epithelium in tissue recombinant chips, even  
210 though there was no difference in permeability when the different epithelia were cultured alone  
211 (**Fig. 4A**). Interestingly, the permeability of the IBD epithelium alone (i.e., without IBD stroma)  
212 was similar to that of healthy epithelium with or without healthy fibroblasts, and tissue



213 recombinants combining healthy fibroblasts with IBD epithelium also did not further alter barrier  
214 function, again emphasizing the key role of that the IBD stroma plays in terms of compromising  
215 intestinal barrier function.

216         This controlling effect of IBD fibroblasts on barrier function when combined with healthy  
217 epithelium was also accompanied by increased production of multiple inflammatory cytokines  
218 and chemokines including IL-6, MCP-1 (**Fig. 4B**), IL-8, CXCL-1, LIF, IL-21, PIGF-1, and MIP-1b  
219 (**Extended Data Fig. 10A**) relative to chips lined by healthy fibroblasts and epithelium or healthy  
220 epithelium alone. However, the IBD epithelium appeared to constitutively express high levels of  
221 all these cytokines regardless of whether or not IBD fibroblasts were present or they were  
222 replaced with healthy fibroblasts, except for production of IL-6 and MCP-1 that were further  
223 enhanced by the presence of the IBD stroma (**Fig. 4C** and **Extended Data Fig. 10B**). As these  
224 two cytokines are known to promote monocyte infiltration into stroma from the vascular system  
225 and their differentiation to macrophages cells<sup>40</sup>, we perfused human peripheral blood  
226 mononuclear cells (PBMCs) through the basal channel of the Colon Chips. We found that more  
227 PBMCs adhered to the stroma and migrated to the epithelial channel in the IBD Chips  
228 compared to Healthy Chips (**Fig. 4D**). While application of peristalsis-like deformations did not  
229 alter PBMC adhesion to the stroma in the basal channel, it significantly enhanced the migration  
230 of these cells to the epithelium in the apical channel, but only in IBD Chips (**Fig. 4E**). However,  
231 when we carried out a similar study in a heterotypic tissue recombinant chip containing IBD  
232 epithelium with healthy fibroblasts, PBMC recruitment and migration were suppressed and  
233 reverted to the low levels observed in Healthy Chips (**Fig. 4D,E**). This finding correlates well  
234 with transcriptomic analysis, which revealed that multiple surface receptors for immune cell  
235 adhesion are expressed at higher levels in fibroblasts and epithelium in IBD Chips versus  
236 Healthy Chips (**Extended Data Fig. 10C**). IBD Chips co-cultured with PBMCs also showed  
237 increased production of IL-6 and IL-8 in both their apical and basal channels, whereas this was  
238 not observed when Healthy Chips (**Extended Data Fig. 10D**).

## 239 **Modeling Early Cancer Progression in Human IBD Chips**

240 Patients with IBD have a higher incidence of colorectal cancer formation<sup>41</sup> and this also  
241 has been demonstrated in animal IBD models by exposing them to the carcinogen ENU<sup>42</sup>.  
242 When we exposed Healthy and IBD Chips created with cells from multiple different donors to  
243 ENU (1 mM) for 3 weeks, we observed a decrease in the height of crypt-like structures (**Fig.**  
244 **5A,B**) and an increase in barrier permeability (**Fig. 5C**) in both in healthy and IBD Chips.  
245 However, ENU had a much greater impact on inflammatory cytokine secretion in the IBD Chips  
246 (**Fig. 5D**) and it resulted in a greater reduction of E-cadherin expression in IBD Chips versus  
247 Healthy Chips, which was accompanied by a concomitant increase in  $\beta$ -catenin translocation to  
248 the nucleus (**Fig. 5E,F**). Similar activation of the  $\beta$ -catenin signaling pathway has previously  
249 been shown to be associated with colorectal cancer progression<sup>43</sup>. In addition, ENU treatment  
250 promoted enlargement of epithelial nuclei and a decrease in their roundness, which are also  
251 known to accompany early carcinogenesis<sup>44</sup>. Importantly, shallow pass genome sequencing  
252 revealed increased gene mutations and duplication in IBD Chips, but not in Healthy Chips (**Fig.**  
253 **5G**). Interestingly, the Crohn's chips exhibited a higher level of gene amplification than chips  
254 lined with cells from UC patients, and an existing mutation in one Crohn's patient was further  
255 amplified after ENU exposure.

256

## 257 **Discussion**

258 Taken together, these findings show that human Colon Chips created with primary  
259 patient-derived colonic epithelium and fibroblasts from both healthy and IBD patients  
260 recapitulate many features of their respective healthy and diseased phenotypes that are  
261 observed in vivo. Based on its synthetic nature, this model enabled exploration of the roles of  
262 stromal fibroblasts, epithelium, and immune cells, as well as fluid flow and peristalsis-like  
263 mechanical deformations in the etiology of this disease. Importantly, our results revealed that

264 the stroma is a key driver of the IBD phenotype as it appears to drive effects on intestinal  
265 permeability, inflammation, and immune cell infiltration in human intestinal tissues. The finding  
266 that IBD stromal fibroblasts respond differently to physiological peristalsis motions than healthy  
267 fibroblasts and exhibits enhanced inflammation and fibrotic responses while fluid flow was  
268 maintained constant also suggests that physiological mechanical deformations of intestine  
269 during early stages of IBD development may feed back to further enhance inflammation and  
270 fibrosis thereby accelerating disease progression. In addition, we found that ovarian hormones  
271 influence the IBD phenotype directly by targeting the intestinal stroma. The greater  
272 enhancement of inflammation and fibrosis we observed when IBD Chips were exposed to these  
273 female hormones could be at least in part explain the exacerbation of IBD symptoms observed  
274 in women versus men, particularly during pregnancy. Finally, we demonstrated that the human  
275 IBD Chips also exhibit an enhanced sensitivity to a carcinogen and undergo changes that  
276 underlie early stages of carcinogenesis in vitro, which is again consistent with the finding that  
277 IBD patients have an increased propensity to develop colorectal cancers.

278 Our finding that intestinal stromal fibroblasts influence immune cell trafficking is  
279 consistent with a past study in which knock out of genes expressed in an inflammatory subset of  
280 fibroblasts produced a similar effect in a mice DSS colitis model<sup>12</sup>. These results raise the  
281 possibility that human Colon Chips could be used as a preclinical model with IBD patient cells to  
282 study the effects of emerging immune cell targeting therapies (e.g., anti-integrin  $\alpha 4\beta 7$  to  
283 suppress infiltration of circulating T-cells) on IBD stroma versus epithelium and to determine  
284 their potential efficacy in a patient-specific manner<sup>45</sup>. In addition, this work might serve as  
285 inspiration to develop other stroma-targeted therapies given our findings that the stroma is a key  
286 driver of the IBD state in both females and males. The stroma also plays a critical role in  
287 intestinal homeostasis by supporting the intestinal stem cell niche growth and modulating  
288 immune responses, as well as protection against microbiota<sup>46</sup>.

289 Another novel feature of this study is its relevance for Women's Health. Female IBD patients  
290 can experienced loose and increased stools during the menstrual cycle as well as greater fetal  
291 complications during pregnancy<sup>39,47</sup>. However, it has not been possible in the past to explore  
292 whether or not these symptoms are the result of direct effects of female hormones on intestinal  
293 tissues. This is because female hormone research is challenging using animals. For example,  
294 mice that are often used for women's health research<sup>48</sup> do not menstruate like humans do (e.g.,  
295 they undergo an estrous cycle) and their immune responses different significantly from human<sup>49</sup>.  
296 Consistent with clinical observations, we found that female hormones exacerbate inflammation  
297 and fibrosis in IBD Chips, but not in Healthy Chips, with pregnancy-like conditions producing  
298 even greater effects. Thus, these data demonstrate for the first time that at least part of the  
299 exacerbations observed in female patients is likely due to direct effects on the intestinal tissues,  
300 and particular on the stroma where fibrosis is greatly enhanced.

301 In addition to increased inflammation and decreased mucus production, lack of intestinal  
302 motion due to fibrosis is a hallmark of IBD; however, it has not been previously possible to  
303 explore whether peristalsis plays a role in earlier stages of IBD progression. We found that  
304 peristalsis-like mechanical deformations increased production of the protective mucus layer in  
305 Healthy Chips, but less so in IBD Chips, and that these mechanical cues also enhanced  
306 inflammation and fibrosis, but only in IBD Chips. This suggests that persistence of physiological  
307 peristalsis during early stages of inflammation may promote progression of IBD, and that fibrosis  
308 and resultant suppression of peristalsis likely occur at a later stage in this process. This may, in  
309 part, occur because the IBD tissues lose their ability to maintain the mucus barrier that protects  
310 against dysbiotic microbiome and pathogens that are known to be enriched in the microbiome of  
311 IBD patients, such as *Ruminococcus* family members that degrade mucus<sup>50</sup>. This could then  
312 lead to more inflammation and a positive feedback loop characterized by enhanced sensitivity to  
313 these mechanical deformations resulting in greater increases in inflammation, ECM

314 accumulation, and fibrosis at later stages of the disease, which stiffens the mucosa and  
315 physically restricts tissue distension.<sup>41</sup>

316 Chronic inflammation in patients with IBD is known to be a risk factor for increased cancer  
317 formation. Importantly, our results show that human IBD tissues do indeed exhibit an enhanced  
318 sensitivity to a carcinogen (ENU) compared to Healthy colon tissues on-chip, as indicated by  
319 crypt blunting, loss of adherent junctions, and localization of  $\beta$ -catenin to the nucleus as seen in  
320 IBD patient tissues that progressed to colorectal cancer<sup>51</sup>. Importantly, we also observed a  
321 greatly increased inflammatory response as well as accelerated development of cancer-  
322 associated mutations and chromosomal amplifications in IBD Chips but not Healthy Chips, even  
323 though immune cells were not present. While similar effects have been observed after exposure  
324 to ENU in a murine intestine model<sup>52</sup>, this to our knowledge is the first demonstration of early  
325 cancer progression in a preclinical *human* IBD model. Although it has been believed that both  
326 Crohn's and UC patients carry a similarly high risk of cancer progression<sup>53</sup>, many Crohn's  
327 patients undergo colectomy early in the course of the disease to alleviate persistent  
328 symptoms<sup>54</sup>, and this effectively eliminates their risk of developing colorectal cancer.<sup>59</sup>  
329 Interestingly, although our sampling was small, we found that ENU induced greater gene and  
330 chromosomal aberrations in Crohn's patient tissues than in UC patient chips, suggesting that  
331 they might exhibit a greater susceptibility to carcinogens. This is a finding which should be  
332 followed up in clinical studies in the future.

333 The incidence of IBD is anticipated to increase in the upcoming years. Limitations in the  
334 ability of in vivo models to represent human IBD physiology are evident, as the most commonly  
335 used anti-TNF and anti-IL-12/23p40 antibodies, which benefit patients with IBD, are generally  
336 not effective in chemically-induced colitis models<sup>55</sup>. The need for modeling IBD using Organ  
337 Chip technology also has been acknowledged by leading IBD organizations, such as the  
338 Crohn's and Colitis Foundation<sup>56</sup>. Therefore, we believe this novel microfluidic disease model  
339 brings important opportunities for IBD treatment, management, and drug development. As we

340 can analyze outflows from the epithelial and stromal compartments separately and through use  
341 of tissue recombinants, this method also may facilitate discovery of potential stool and blood  
342 biomarkers of IBD progression and cancer risk. Use of tissue recombinants is a powerful  
343 method for analyzing epithelial-mesenchymal interactions in commonly used developmental  
344 biology research, which as we show here also may be applied to confront similar questions  
345 relating to human epithelial-stromal interactions, which are challenging to address in vivo. In  
346 addition to enabling study of the effects of female hormones on IBD, and it also could allow  
347 investigation of other IBD subcategories, including very early onset (VEO-IBD), adolescent IBD,  
348 and genetic forms of the disease by lining chips with relevant patient cells. Finally, given the  
349 synthetic nature of the model and as living gut microbiome can be co-cultured in these Intestine  
350 Chips for extended times<sup>15,57</sup>, this experimental system also may be used to study how other  
351 environmental factors (e.g., pathogens, diet, etc.) contribute to development of the IBD  
352 phenotype in the future.

## 353 **Methods**

### 354 **Acquisition of human colon tissue and cells**

355 Healthy colon tissue samples were collected from macroscopically grossly unaffected  
356 regions of the colon of de-identified healthy adult patients undergoing endoscopy for non-IBD  
357 related complaints, such as diverticulitis. IBD tissue samples were collected from endoscopic  
358 tissue biopsies from newly diagnosed IBD patients with either Crohn's disease or Ulcerative  
359 Colitis. Informed consent and developmentally appropriate assent were obtained at Boston  
360 Children's Hospital and McGill University Health Centre from the donors' guardians and the  
361 donor, respectively. All methods were performed in accordance with the Institutional Review  
362 Board of Massachusetts General Hospital approval (protocol number IRB-2015P001859) and  
363 McGill University Health Centre (protocol number REB-2007-856). We generated epithelium-  
364 derived organoids (colonoids) that were cultured in Matrigel using published methods<sup>13,15</sup> and  
365 isolated stromal fibroblasts from the same IBD tissues from 3 Crohn's and 3 UC patients, which

366 were cultured in fibroblast medium (FM, CC-3132, Lonza, MA) in 75 cm<sup>2</sup> flasks (3531135,  
367 Falcon, Durham, NC). Healthy colonoids and fibroblasts were isolated from areas with normal  
368 histology adjacent to regions of diverticulitis from 3 otherwise healthy patients (**Supplementary**  
369 **Table 1**). All reagents and resources were provided in **Supplementary Table 2**.

### 370 **Human Colon Chip Cultures**

371 Our methods for creating and culturing human Colon Chips lined by primary intestinal  
372 organoid-derived epithelium using commercially available Organ Chip Devices (Basic Research  
373 Kit; Emulate Inc.) have been described previously<sup>13,16</sup> and are described in greater detail in  
374 Supplementary Materials. Colonoids cultured were released from Matrigel and fragmented by  
375 treatment with TrypLE Express Enzyme (12605010; Thermo Fisher Scientific), before being  
376 seeded in the apical channel of the 2-channel Organ Chip devices and incubated overnight at  
377 37° C under 5% CO<sub>2</sub> to promote adhesion. One day later, channels were washed with  
378 Expansion Medium (EM; Harvard Digestive Diseases Center Organoid Core, MA) to remove  
379 unattached cells, and then perfused with EM (60 µL/hr). At this time, the cultured fibroblasts  
380 were detached enzymatically and seeded in EM in the basal channel for 2 h under static  
381 conditions to promote adhesion. After washing, EM was then perfused through both channels at  
382 60 µL/h. After 3 days of co-culture during which both epithelial and fibroblast monolayers were  
383 established, EM perfused through the apical channel was changed to Hank's balanced salt  
384 solution (HBSS) with calcium and magnesium (21-023-cv; Corning) supplemented with 100  
385 mg/mL Primocin (ant-pm-1; InvivoGen) while EM remained flowing through the basal channel.  
386 For experiments exploring the role of physiological peristalsis-like motions, cyclic mechanical  
387 strain (10% Strain 0.15 Hz) was applied to the tissues by applying cyclic suction to side  
388 chambers of the flexible device<sup>15,16</sup> for 2 weeks after seeding. Methods for morphological  
389 analysis, cytokine quantification, flow cytometry, transcriptional analysis, and atomic force  
390 microscopy can be found in **Supplementary Information**.

### 391 **Maternal Hormone Treatment**

392 Established Healthy and IBD Colon Chips were exposed to different combinations of  
393 hormones from basal channel to recapitulate either the menstrual cycle or first trimester of  
394 pregnancy. Chips were treated with 17 $\beta$ -estradiol (E2, 10 nM, Sigma, E4389) for 3 days before  
395 being exposed to medroxyprogesterone 17-acetate (MPA, 1  $\mu$ M, Sigma, 46412-250MG) for an  
396 additional 4 days to mimic the menstrual period of the cycle. Chips perfused for 3 days with E2  
397 were then treated with E2, MPA, Prolactin (PRL, 20 ng/mL, VWR, 103681-334), Human  
398 Placental Lactogen (hPL/ CSH1, 20 ng/ml, VWR, 103681-334), and Human Chorionic  
399 Gonadotropin (HCG, 1  $\mu$ g/mL, VWR, IC0219859110) for 4 days to recapitulate the first trimester  
400 of pregnancy as described previously<sup>17,18</sup>.

#### 401 **Immune Cell Recruitment Assay**

402 Colon Chips were cultured for 2 weeks before human peripheral blood mononuclear  
403 cells (PBMCs) were added to the cultures for studies on immune cell adhesion and migration.  
404 PBMCs were collected from anonymous donors undergoing stem cell mobilization at the  
405 Massachusetts General Hospital (MGH) under Institutional Review Board approved protocol  
406 #2015P001859. PBMCs were freshly isolated by density centrifugation using the Lymphoprep  
407 protocol (StemCell Technologies, #07801), resuspended in 10 ml of DMEM containing 10%  
408 FBS and 1% Penicillin-Streptomycin, and labeled with 10  $\mu$ l of CellTracker Deep Red at a final  
409 concentration of 10  $\mu$ M (Invitrogen, #C7025) for 20 minutes at 37°C. The labeled cells were  
410 centrifuged and resuspended to a concentration of 5  $\times$  10<sup>7</sup> cells/ml and 25  $\mu$ l of the PBMC  
411 suspension was added to the lower channel (see **Supplementary Information** for more  
412 details).

#### 413 **Analysis of effects of carcinogen exposure**

414 To explore if the chip models can be used to study the effects of intestinal tissue to  
415 carcinogen exposure in vitro, Healthy and IBD Colon Chips were exposed to 1  $\mu$ g/mL of N-ethyl-  
416 N-nitrosourea (ENU), which was flowed through both the apical and basal channels at 60  $\mu$ L/hr.



417 Chips were harvested for DNA isolation three weeks after ENU exposure. Briefly, chips were  
418 washed with DPBS (-/-) and incubated with TrypLE consisting of 2 mg/mL collagenase and 10  
419  $\mu$ M Y-27632 at 37°C for 1 h. Single cells were washed with DPBS (-/-) and DNA was isolated by  
420 following the manufacturer's protocol (Qiagen Micro DNA isolation kit, Cat: 56304 Qiagen,  
421 Germany). Shallow whole genome sequencing was performed in two batches using different  
422 methods (see **Supplementary Information**). The raw sequence reads were mapped to *Homo*  
423 *sapiens* GRCh38 with Burrows-Wheeler Alignment Tool v0.7.17<sup>19</sup>. Reads with a mapping quality  
424 of less than 37 were removed from further analysis. The PCR duplicates and base quality  
425 recalibration were subsequently carried out using Genome Analysis Toolkit (GATK) v4.4.0<sup>20</sup> and  
426 Picard v2.27.5. The copy number of the genome was then estimated and profiled with ACE  
427 v3.16<sup>21</sup> and QDNAseq v1.35.0 R package<sup>22</sup> using 100 Mb fixed-sized bins.

#### 428 **Statistical Analysis**

429 Data in all graphs are expressed as mean  $\pm$  standard deviation (SD) and significant  
430 differences between multiple groups were determined using an unpaired Students t-test, one-  
431 way analysis of variance (ANOVA) or two-way ANOVA with Tukey test for correction unless  
432 otherwise indicated in the figure legends.  $P < 0.05$  was considered significant. Data were  
433 analyzed using GraphPad Prism 8 software (GraphPad Software, San Diego, CA).

#### 434 **Acknowledgement**

435 This work was funded in part by Cancer Research UK (C19767/A27145 to DEI) and by  
436 the Wyss Institute for Biologically Inspired Engineering at Harvard University as well as by an  
437 NIH training grants (5T32DK007199-44 and 5T32EB016652-10 to AO). We thank Harvard  
438 Digestive Diseases Center Organoid Core for providing L-WRN conditioned media.

#### 439 **Contributions**

440 A.O., S.H. and D.E.I designed the research; A.O., G.E.M, R.R.P. A.S. K. C., E. C. performed the  
441 experiments; A.O., G.E.M., R.R.P. A.S., K.C., E.C. analyzed and interpreted the data; A.O. and  
442 G.E.M. established IBD human organoid and fibroblast biobanks; V. H., M. S. and A.O.

443 performed bioinformatic analysis; D.B.C., L.E.F., R.R., L.B. provided the clinical samples; A.O.  
444 and D.E.I. acquired the funding; A.O. wrote the article with input from G.G., S.H. and D.E.I.;  
445 and all authors reviewed, discussed and edited the manuscript.

#### 446 **Data and code availability**

447 Data that support the findings of this study are available within the paper and its  
448 Supplementary Information files. The RNA sequencing data have been deposited in the Gene  
449 Expression Omnibus (GEO) with the accession code GSE277964. Any other material including  
450 the R code used for data analysis is available upon reasonable request.

#### 451 **Competing interests**

452 D.E.I. holds equity in Emulate, chairs its scientific advisory board and is a member of its board  
453 of directors. The other authors declare no competing interests.

#### 454 **References**

- 455 1. Friedrich, M. *et al.* IL-1-driven stromal–neutrophil interactions define a subset of patients  
456 with inflammatory bowel disease that does not respond to therapies. *Nat Med* **27**, 1970–  
457 1981 (2021).
- 458 2. Goodman, W. A., Erkkila, I. P. & Pizarro, T. T. Sex matters: impact on pathogenesis,  
459 presentation and treatment of inflammatory bowel disease. *Nature Reviews*  
460 *Gastroenterology & Hepatology* *2020 17:12* **17**, 740–754 (2020).
- 461 3. Watermeyer, G. Pregnancy and inflammatory bowel disease. *South African*  
462 *Gastroenterology Review* **5**, 4–6 (2007).
- 463 4. Sarvestani, S. K. *et al.* Cancer-predicting transcriptomic and epigenetic signatures  
464 revealed for ulcerative colitis in patient-derived epithelial organoids. *Oncotarget* **9**,  
465 28717–28730 (2018).
- 466 5. Ingber, D. E. Cancer as a disease of epithelial–mesenchymal interactions and  
467 extracellular matrix regulation. *Differentiation* **70**, 547–560 (2002).
- 468 6. Smillie, C. S. *et al.* Intra- and Inter-cellular Rewiring of the Human Colon during Ulcerative  
469 Colitis. *Cell* **178**, 714–730.e22 (2019).
- 470 7. Rieder, F. & Fiocchi, C. Intestinal fibrosis in IBD - A dynamic, multifactorial process. *Nat*  
471 *Rev Gastroenterol Hepatol* **6**, 228–235 (2009).

- 472 8. Guglielmo, F. F. *et al.* Identifying decreased peristalsis of abnormal small bowel  
473 segments in Crohn's disease using cine MR enterography: the frozen bowel sign. *Abdom*  
474 *Imaging* **40**, 1150–1156 (2015).
- 475 9. Joshi, A., Soni, A. & Acharya, S. In vitro models and ex vivo systems used in  
476 inflammatory bowel disease. *In vitro models 2022 1:3* **1**, 213–227 (2022).
- 477 10. Özkan, A., LoGrande, N. T., Feitor, J. F., Goyal, G. & Ingber, D. E. Intestinal organ chips  
478 for disease modelling and personalized medicine. *Nat Rev Gastroenterol Hepatol* 1–23  
479 (2024) doi:10.1038/s41575-024-00968-3.
- 480 11. Ingber, D. E. Human organs-on-chips for disease modelling, drug development and  
481 personalized medicine. *Nat Rev Genet* **23**, 467–491 (2022).
- 482 12. Gustafsson, J. K. & Johansson, M. E. V. The role of goblet cells and mucus in intestinal  
483 homeostasis. *Nat Rev Gastroenterol Hepatol* **19**, 785–803 (2022).
- 484 13. Sontheimer-Phelps, A. *et al.* Human Colon-on-a-Chip Enables Continuous In Vitro  
485 Analysis of Colon Mucus Layer Accumulation and Physiology. *Cmgh* **9**, 507–526 (2020).
- 486 14. Tovaglieri, A. *et al.* Species-specific enhancement of enterohemorrhagic E. coli  
487 pathogenesis mediated by microbiome metabolites. *Microbiome* **7**, 1–21 (2019).
- 488 15. Jalili-Firoozinezhad, S. *et al.* A complex human gut microbiome cultured in an anaerobic  
489 intestine-on-a-chip. *Nat Biomed Eng* **3**, 520–531 (2019).
- 490 16. Tovaglieri, A. *et al.* Species-specific enhancement of enterohemorrhagic E. coli  
491 pathogenesis mediated by microbiome metabolites. *Microbiome* **7**, 1–21 (2019).
- 492 17. Turco, M. Y. *et al.* Long-term, hormone-responsive organoid cultures of human  
493 endometrium in a chemically defined medium. *Nat Cell Biol* **19**, 568–577 (2017).
- 494 18. Gnecco, J. S. *et al.* Organoid co-culture model of the human endometrium in a fully  
495 synthetic extracellular matrix enables the study of epithelial-stromal crosstalk. *Med* **4**,  
496 554-579.e9 (2023).
- 497 19. Li, H. & Durbin, R. Fast and accurate short read alignment with Burrows–Wheeler  
498 transform. *Bioinformatics* **25**, 1754–1760 (2009).
- 499 20. Genomics in the Cloud: Using Docker, GATK, and WDL in Terra - Geraldine A. Van der  
500 Auwera, Brian D. O'Connor - Google Books.  
501 [https://books.google.com/books?hl=en&lr=&id=vsXaDwAAQBAJ&oi=fnd&pg=PP1&dq=Van+der+Auwera+GA+%26+O%27Connor+BD.+\(2020\).+Genomics+in+the+Cloud:+Using+Docker,+GATK,+and+WDL+in+Terra+\(1st+Edition\).+O%27Reilly+Media.&ots=5lcr0E-qna&sig=43MTbQQNO\\_yexxB7NxDgVt88kOk#v=onepage&q&f=false](https://books.google.com/books?hl=en&lr=&id=vsXaDwAAQBAJ&oi=fnd&pg=PP1&dq=Van+der+Auwera+GA+%26+O%27Connor+BD.+(2020).+Genomics+in+the+Cloud:+Using+Docker,+GATK,+and+WDL+in+Terra+(1st+Edition).+O%27Reilly+Media.&ots=5lcr0E-qna&sig=43MTbQQNO_yexxB7NxDgVt88kOk#v=onepage&q&f=false)  
502  
503  
504

- 505 21. Poell, J. B. *et al.* ACE: absolute copy number estimation from low-coverage whole-  
506 genome sequencing data. *Bioinformatics* **35**, 2847–2849 (2019).
- 507 22. Scheinin, I. *et al.* DNA copy number analysis of fresh and formalin-fixed specimens by  
508 shallow whole-genome sequencing with identification and exclusion of problematic  
509 regions in the genome assembly. *Genome Res* **24**, 2022–2032 (2014).
- 510 23. Chan, C. W. M. *et al.* Gastrointestinal differentiation marker Cytokeratin 20 is regulated  
511 by homeobox gene CDX. *Proc Natl Acad Sci U S A* **106**, 1936–1941 (2009).
- 512 24. West, N. R. *et al.* Oncostatin M drives intestinal inflammation and predicts response to  
513 tumor necrosis factor–neutralizing therapy in patients with inflammatory bowel disease.  
514 *Nat Med* **23**, 579–589 (2017).
- 515 25. Wu, J. *et al.* Therapeutic targeting of vimentin by ALD-R491 impacts multiple pathogenic  
516 processes to attenuate acute and chronic colitis in mice. *Biomedicine & Pharmacotherapy*  
517 **168**, 115648 (2023).
- 518 26. Torres, J. *et al.* Serum Biomarkers Identify Patients Who Will Develop Inflammatory  
519 Bowel Diseases Up to 5 Years Before Diagnosis. *Gastroenterology* **159**, 96–104 (2020).
- 520 27. Danese, S., Sans, M. & Fiocchi, C. The CD40/CD40L costimulatory pathway in  
521 inflammatory bowel disease. *Gut* **53**, 1035 (2004).
- 522 28. Liu, Z. *et al.* Genetic architecture of the inflammatory bowel diseases across East Asian  
523 and European ancestries. *Nat Genet* **55**, 796 (2023).
- 524 29. Tian, T., Wang, Z. & Zhang, J. Pathomechanisms of Oxidative Stress in Inflammatory  
525 Bowel Disease and Potential Antioxidant Therapies. *Oxid Med Cell Longev* **2017**,  
526 4535194 (2017).
- 527 30. Stokkers, P. C. F., Reitsma, P. H., Tytgat, G. N. J. & Van Deventer, S. J. H. HLA-DR and  
528 -DQ phenotypes in inflammatory bowel disease: a meta-analysis. *Gut* **45**, 395 (1999).
- 529 31. Yu, W. *et al.* Association of a Nkx2-3 polymorphism with Crohn’s disease and expression  
530 of Nkx2-3 is up-regulated in B cell lines and intestinal tissues with Crohn’s disease. *J*  
531 *Crohns Colitis* **3**, 189–195 (2009).
- 532 32. WO2019018571A1 - Methods and uses of inflammatory bowel disease biomarkers -  
533 Google Patents. <https://patents.google.com/patent/WO2019018571A1/en>.
- 534 33. Srivastava, M., Zurakowski, D., Cheifetz, P., Leichtner, A. & Bousvaros, A. Elevated  
535 Serum Hepatocyte Growth Factor in Children and Young Adults With Inflammatory Bowel  
536 Disease. *J Pediatr Gastroenterol Nutr* **33**, 548–553 (2001).

- 537 34. Cheng, C. *et al.* Identification of differentially expressed genes, associated functional  
538 terms pathways, and candidate diagnostic biomarkers in inflammatory bowel diseases by  
539 bioinformatics analysis. *Exp Ther Med* **18**, 278–288 (2019).
- 540 35. Wilson, A. *et al.* Crohn's Disease Is Associated with Decreased CYP3A4 and P-  
541 Glycoprotein Protein Expression. *Mol Pharm* **16**, 4059–4064 (2019).
- 542 36. Sen, A. & Stark, H. Role of cytochrome P450 polymorphisms and functions in  
543 development of ulcerative colitis. *World J Gastroenterol* **25**, 2846 (2019).
- 544 37. Dubuquoy, L. *et al.* PPAR $\gamma$  as a new therapeutic target in inflammatory bowel diseases.  
545 *Gut* **55**, 1341 (2006).
- 546 38. Ashton, J. J. *et al.* Deleterious Genetic Variation Across the NOD Signaling Pathway Is  
547 Associated With Reduced NFKB Signaling Transcription and Upregulation of Alternative  
548 Inflammatory Transcripts in Pediatric Inflammatory Bowel Disease. *Inflamm Bowel Dis*  
549 **28**, 912–922 (2022).
- 550 39. Lim, S. M. *et al.* The effect of the menstrual cycle on inflammatory bowel disease: A  
551 prospective study. *Gut Liver* **7**, 51–57 (2013).
- 552 40. Chomarat, P., Banchereau, J., Davoust, J. & Karolina Palucka, A. IL-6 switches the  
553 differentiation of monocytes from dendritic cells to macrophages. *Nature Immunology*  
554 *2000 1:6* **1**, 510–514 (2000).
- 555 41. Murphy, C. C. & Zaki, T. A. Changing epidemiology of colorectal cancer — birth cohort  
556 effects and emerging risk factors. *Nat Rev Gastroenterol Hepatol* **21**, 25–34 (2023).
- 557 42. Schmitt, M. & Greten, F. R. The inflammatory pathogenesis of colorectal cancer. *Nat Rev*  
558 *Immunol* **21**, 653–667 (2021).
- 559 43. Herzig, M., Savarese, F., Novatchkova, M., Semb, H. & Christofori, G. Tumor progression  
560 induced by the loss of E-cadherin independent of  $\beta$ -catenin/Tcf-mediated Wnt signaling.  
561 *Oncogene* **26**, 2290–2298 (2007).
- 562 44. Zink, D., Fischer, A. H. & Nickerson, J. A. Nuclear structure in cancer cells. *Nature*  
563 *Reviews Cancer* *2004 4:9* **4**, 677–687 (2004).
- 564 45. D'Alessio, S. *et al.* Revisiting fibrosis in inflammatory bowel disease: the gut thickens. *Nat*  
565 *Rev Gastroenterol Hepatol* **19**, 169–184 (2022).
- 566 46. Ryan, F. J. *et al.* Colonic microbiota is associated with inflammation and host epigenomic  
567 alterations in inflammatory bowel disease. *Nat Commun* **11**, 1–12 (2020).
- 568 47. Mendelson, S., Anbukkarasu, P., Cassisi, J. E. & Zaman, W. Gastrointestinal functioning  
569 and menstrual cycle phase in emerging young adult women: a cross-sectional study.  
570 *BMC Gastroenterol* **23**, 1–10 (2023).

- 571 48. Bellofiore, N., Ellery, S., Mamrot, J., ... D. W.-A. journal of & 2017, undefined. First  
572 evidence of a menstruating rodent: the spiny mouse (*Acomys cahirinus*). *Elsevier*.
- 573 49. Bellofiore, N., Cousins, F., Temple-Smith, P., Dickinson, H. & Evans, J. A missing piece:  
574 the spiny mouse and the puzzle of menstruating species. *J Mol Endocrinol* **61**, R25–R41  
575 (2018).
- 576 50. Paone, P. & Cani, P. D. Mucus barrier, mucins and gut microbiota: the expected slimy  
577 partners? *Gut* **69**, 2232 (2020).
- 578 51. Aust, D. E. *et al.* Altered distribution of  $\beta$ -catenin, and its binding proteins E-cadherin and  
579 APC, in ulcerative colitis-related colorectal cancers. *Modern Pathology* **14**, 29–39 (2001).
- 580 52. Winton, D. J. & Ponder, B. A. J. Stem-cell organization in mouse small intestine. *Proc Biol*  
581 *Sci* **241**, 13–18 (1990).
- 582 53. Winawer, S. J. *et al.* Colorectal Cancer Screening: Clinical Guidelines and Rationale The  
583 Adenoma-Carcinoma Sequence. *Gastroenterology* **112**, 594–642 (1997).
- 584 54. Gillen, C. D., Walmsley, R. S., Prior, P., Andrews, H. A. & Allan, R. N. Ulcerative colitis  
585 and Crohn's disease: a comparison of the colorectal cancer risk in extensive colitis. *Gut*  
586 **35**, 1590 (1994).
- 587 55. Pizarro, T. T. *et al.* Challenges in IBD Research: Preclinical Human IBD Mechanisms.  
588 *Inflamm Bowel Dis* **25**, S5–S12 (2019).
- 589 56. Heller, C. A. *et al.* Challenges in IBD Research. *Inflamm Bowel Dis* **25**, S31–S39 (2019).
- 590 57. Kim, H. J., Huh, D., Hamilton, G. & Ingber, D. E. Human gut-on-a-chip inhabited by  
591 microbial flora that experiences intestinal peristalsis-like motions and flow. *Lab Chip* **12**,  
592 2165–2174 (2012).
- 593
- 594

595 **Figure Legends**

596 **Figure 1: Primary human Colon Chips generated with epithelium and fibroblasts**  
597 **isolated from Healthy and IBD patient samples. A)** Photograph of the commercially available  
598 Organ Chip device (left) and a cross-sectional illustration of the epithelial-stromal tissue  
599 interface (right) formed with patient-derived cells, which is composed of a fibroblast rich stroma  
600 that is perfused with medium to mimic interstitial fluid flow separated by a flexible, porous, ECM-  
601 coated membrane from a colon epithelium above. The epithelium, which is composed of  
602 absorptive cells and Goblet cells, secretes a thick mucus layer into the lumen of the apical  
603 channel that also experiences fluid flow. The entire tissue-tissue interface can be stretched and  
604 relaxed rhythmically to mimic peristalsis-like motions by applying cyclic suction to hollow side  
605 chambers in the flexible device (not shown). **B)** Height of crypts formed in Colon Chips  
606 measured at 11 days. Numbers indicate *P* values between compared groups, as determined by  
607 one-way ANOVA test (n=3 Healthy, green; 2 Crohn's, magenta; and 2 UC, cyan). **C)**  
608 Representative bright field microscopic images of Healthy and IBD Chips created with cells from  
609 Crohn's or UC patients viewed from above on day 3, 7, and 11. A functional epithelial  
610 monolayer progressively accumulated mucus, which appears as opaque blackened fuzzy  
611 material, in the apical channel of all chips over the 11 day time course; however, mucus  
612 accumulation was suppressed in the IBD Chips with the UC Chips displaying a greater  
613 reduction (bar, 500  $\mu\text{m}$ ). **D)** Brightfield image of vertical cross-sections through healthy and IBD  
614 Colon chips showing that the crypt-like epithelial structures are shorter in the Crohn's and UC  
615 Colon Chips (bar, 100  $\mu\text{m}$ ). **E)** Histological H&E stained vertical cross-sections through healthy  
616 and IBD Colon chips confirming the presence of columnar colon epithelium containing goblet  
617 cells in healthy epithelium, and a significant reduction in the height of the epithelial monolayer  
618 with reduced numbers of goblet cells in the IBD Chips (bar, 50  $\mu\text{m}$ ). **F)** Immunofluorescence  
619 microscopic views showing distribution of SOX9 and CK20 in crypts in the colon epithelium of

620 Healthy and IBD Chips (bar, 50  $\mu$ m). **G**) Inflammatory cytokine protein levels measured in the  
621 basal outflows of Healthy (H) and IBD Chips on culture day 11 (n = 3-5 chips/ condition; chips  
622 were created with cells from 3 healthy (green), 2 Crohn's (magenta), and 2 UC (cyan) patient  
623 donors, with each symbol represents a chip created with cells from a different patient. Numbers  
624 indicate *P* values between compared groups, as determined by two-tailed student's t-test. All  
625 data represent mean  $\pm$  SD; *p* values are shown in all figures.

626 **Figure 2: Peristalsis-like cyclic strain influences mucus production and fibrosis in**  
627 **Colon Chips. A)** Representative side-view images microscopy of Healthy or IBD Chips with (+)  
628 and without (-) exposure to mechanical deformations visualizing mucus layer accumulation  
629 (white diffuse material) in Healthy Chips using dark-field microscopy. Note that limited mucus  
630 was produced by IBD epithelium (bar, 1 mm). **B)** Quantification of the height of the mucus layer  
631 overlying Healthy and IBD epithelium on-chip when cultured under the conditions in A. Numbers  
632 indicate *P* values between compared groups, as determined by one-way ANOVA test. (n = 4  
633 healthy, green; 2 Crohn's, magenta; and 2 UC, cyan). **C)** Heat map of genes showing that  
634 peristalsis-like mechanical stimulation (+) increases expression of genes related to mucus  
635 production in Healthy Chips, but not IBD Chips (n = 3 healthy, 1 Crohn's and 2 UC). **D)** Second  
636 harmonic microscopic images of the fibroblast stroma in Healthy versus IBD Chips showing  
637 greater collagen fibril accumulation (green) with mechanical strain (+ Strain) in both chips, and  
638 that this response is greatly accentuated in IBD Chips (bar, 200  $\mu$ m). **E)** Collagen fibril signal  
639 intensity in the stroma of Healthy versus IBD Chips quantified in second harmonic microscopic  
640 images. Numbers indicate *P* values between compared groups, as determined by one-way  
641 ANOVA test (n = 3 healthy, green; 2 Crohn's, magenta; and 2 UC, cyan). **F)** Heat map of genes  
642 showing that peristalsis-like cyclic strain enhances expression of genes associated with fibrillar  
643 collagen production in IBD fibroblasts, but not in healthy fibroblasts (n = 3 healthy, 1 Crohn's  
644 and 2 UC). **G)** Heat maps of showing that cyclic strain enhances greater expression of IBD-



645 associated inflammatory genes in IBD Chips compared to Healthy Chips both in epithelium and  
646 fibroblasts (n=3 Healthy, 1 Crohn's, and 2 UC).

647 **Figure 3: Effects of ovarian hormones in Female Colon Chips. A)** Production of pro-  
648 inflammatory cytokine and chemokine proteins in Apical and Basal channels of Healthy versus  
649 IBD Chips 7 days post treatment with different female hormone exposures (E2, P4, and PAHs,  
650 as indicated). Note that exposure to female hormones significantly increased expression of  
651 inflammatory factors in both epithelium and fibroblast of IBD Colon Chips whereas they  
652 suppressed their production in Healthy Chips. **B)** Collagen fibril signal intensity in the stroma of  
653 Healthy versus IBD Chips quantified in second harmonic microscopic images showing that only  
654 exposure to pregnancy-like hormonal conditions produced a major increase in stromal  
655 fibrillogenesis, and this only was observed in IBD fibroblasts and not healthy fibroblasts from  
656 IBD patients. Numbers indicate *P* values between compared groups, as determined by one-way  
657 ANOVA test (n=4-6 chips of 1 Crohn's and 1 Healthy patients from 2 independent experiments).  
658 **C)** Second harmonic microscopic images of fibrillar collagen (green) produced by fibroblasts  
659 showing that the E2 + E4 produce a small increase in fibrillogenesis in IBD Chips, while  
660 simulating pregnancy by exposure to E2 + E4 + PAH results in dramatic collagen fibril  
661 accumulation, and that neither of these responses are observed in Healthy Chips (bar, 200  $\mu$ m;  
662 n=4-6 chips of 1 Crohn's and 1 Healthy patients from 2 independent experiments).

663 **Figure 4: Tissue recombinant chips reveal that the IBD fibroblasts drive**  
664 **compromise of the permeability barrier and inflammation in the epithelium. A)** Graphs  
665 showing that intestinal barrier permeability to cascade blue is much higher in homotypic IBD  
666 Chips compared to Healthy Chips and that tissue recombinants of IBD fibroblasts with healthy  
667 (H) epithelium results in a similar high level of barrier compromise on-chip. This is not observed  
668 in the IBD or healthy epithelium in the absence of fibroblasts or in IBD epithelium with healthy  
669 fibroblasts. Numbers indicate *P* values between compared groups, as determined by one-way  
670 ANOVA test (n = 3 healthy, green; 2 Crohn's, magenta; and 2 UC, cyan). **B)** Quantification of

671 cytokine protein levels revealed that combination of IBD fibroblasts with healthy epithelium  
672 results in increased production of IL-6 and MCP-1 in Colon Chips, whereas this was not seen in  
673 healthy epithelium alone or homotypic Colon Chips. Numbers indicate *P* values between  
674 compared groups, as determined by one-way ANOVA test (n = 3 healthy, green; 1 Crohn's,  
675 magenta; and 2 UC, cyan). **C)** IL-6 and MCP-1 production by IBD epithelium also required the  
676 presence of IBD fibroblasts. Numbers indicate *P* values between compared groups, as  
677 determined by one-way ANOVA test (n = 3 healthy, green; 1 Crohn's, magenta; and 2 UC,  
678 cyan). **D)** Peristalsis-like cyclic strain preferentially stimulates migration of PBMCs (magenta)  
679 from the fibroblast stroma in the basal channel (Basal) to the epithelium in the apical channel  
680 (Apical) in IBD Chips but not in heterotypic chips with IBD epithelium and healthy fibroblasts or  
681 in Healthy Chips. **E)** Quantification of the results from **D** confirmed that IBD Chips exhibited  
682 higher baseline recruitment of PBMCs to the surface of the fibroblast stroma in the basal  
683 channel and that this was not altered by mechanical strain, whereas IBD epithelium combined  
684 with healthy stroma or Healthy Chips only displayed significantly less PBMC recruitment. In  
685 contrast, the number of PBMCs that migrated to the epithelium in the Apical channel more than  
686 doubled in IBD Chips when they were exposed to peristalsis-like mechanical deformations, and  
687 overall migration of PBMCs was minimal when IBD fibroblasts were absent. Numbers indicate  
688 *P* values between compared groups, as determined by one-way ANOVA test (n = 2 healthy,  
689 green; 1 Crohn's, magenta; and 1 UC, cyan).

690 **Figure 5: Exposure to carcinogen preferentially promotes mutagenesis and early**  
691 **steps in carcinogenesis in IBD Chips. A)** DIC images of the epithelium when viewed from  
692 above in Healthy (H) and IBD Chips after 21 days of culture in the presence or absence of the  
693 carcinogen (ENU) showing that undulating crypt-like structures are lost in both Healthy and IBD  
694 Chips after exposure to ENU (bar, 500  $\mu$ m). **B)** Quantification of results from **A** showing that  
695 ENU decreases height of the epithelium in both healthy and IBD Colon Chips. Numbers indicate  
696 *P* values between compared groups, as determined by one-way ANOVA test (n = 4 healthy,

697 green; 2 Crohn's, magenta; and 2 UC, cyan). **C)** Epithelial barrier permeability increased as a  
698 result of exposure to ENU in Healthy and IBD Chips. Numbers indicate *P* values between  
699 compared groups, as determined by one-way ANOVA test. (n = 3 healthy, green; 2 Crohn's,  
700 magenta; and 2 UC, cyan). **D)** Heatmaps showing inflammatory cytokine protein levels  
701 measured in outflows from the apical channel of Healthy and IBD Chips 3 weeks post-ENU  
702 exposure. Importantly, ENU exposure significantly increased inflammatory cytokine production  
703 in IBD Chips made with cells from both Crohn's and UC patients compared to healthy patients.  
704 **E)** Confocal microscopic top-view images showing  $\beta$ -catenin and E-cadherin localization and  
705 nuclear staining (DAPI) in the epithelium within Healthy and IBD Chips 3 weeks post-ENU  
706 exposure (bar, 20  $\mu$ m). **F)** Quantification of protein staining intensity and morphology reveal that  
707 ENU exposure decreases E-cadherin levels and increases nuclear localization of  $\beta$ -catenin in  
708 IBD patient-derived Colon Chips compared to Healthy Chips. ENU exposure also resulted in  
709 greater nucleus size and less roundness. Numbers indicate *P* values between compared  
710 groups, as determined by Student's t-test (n = 3 healthy, green; 2 Crohn's, magenta; and 2 UC,  
711 cyan). **G)** Plots showing copy number changes across all human chromosomes in Healthy and  
712 IBD Chips pre- (red) and 3 weeks post-ENU exposure (blue). Green bars indicate amplification  
713 of gene sequences for the whole chromosome. Each symbol represents an individual Healthy or  
714 IBD patient-derived chip.

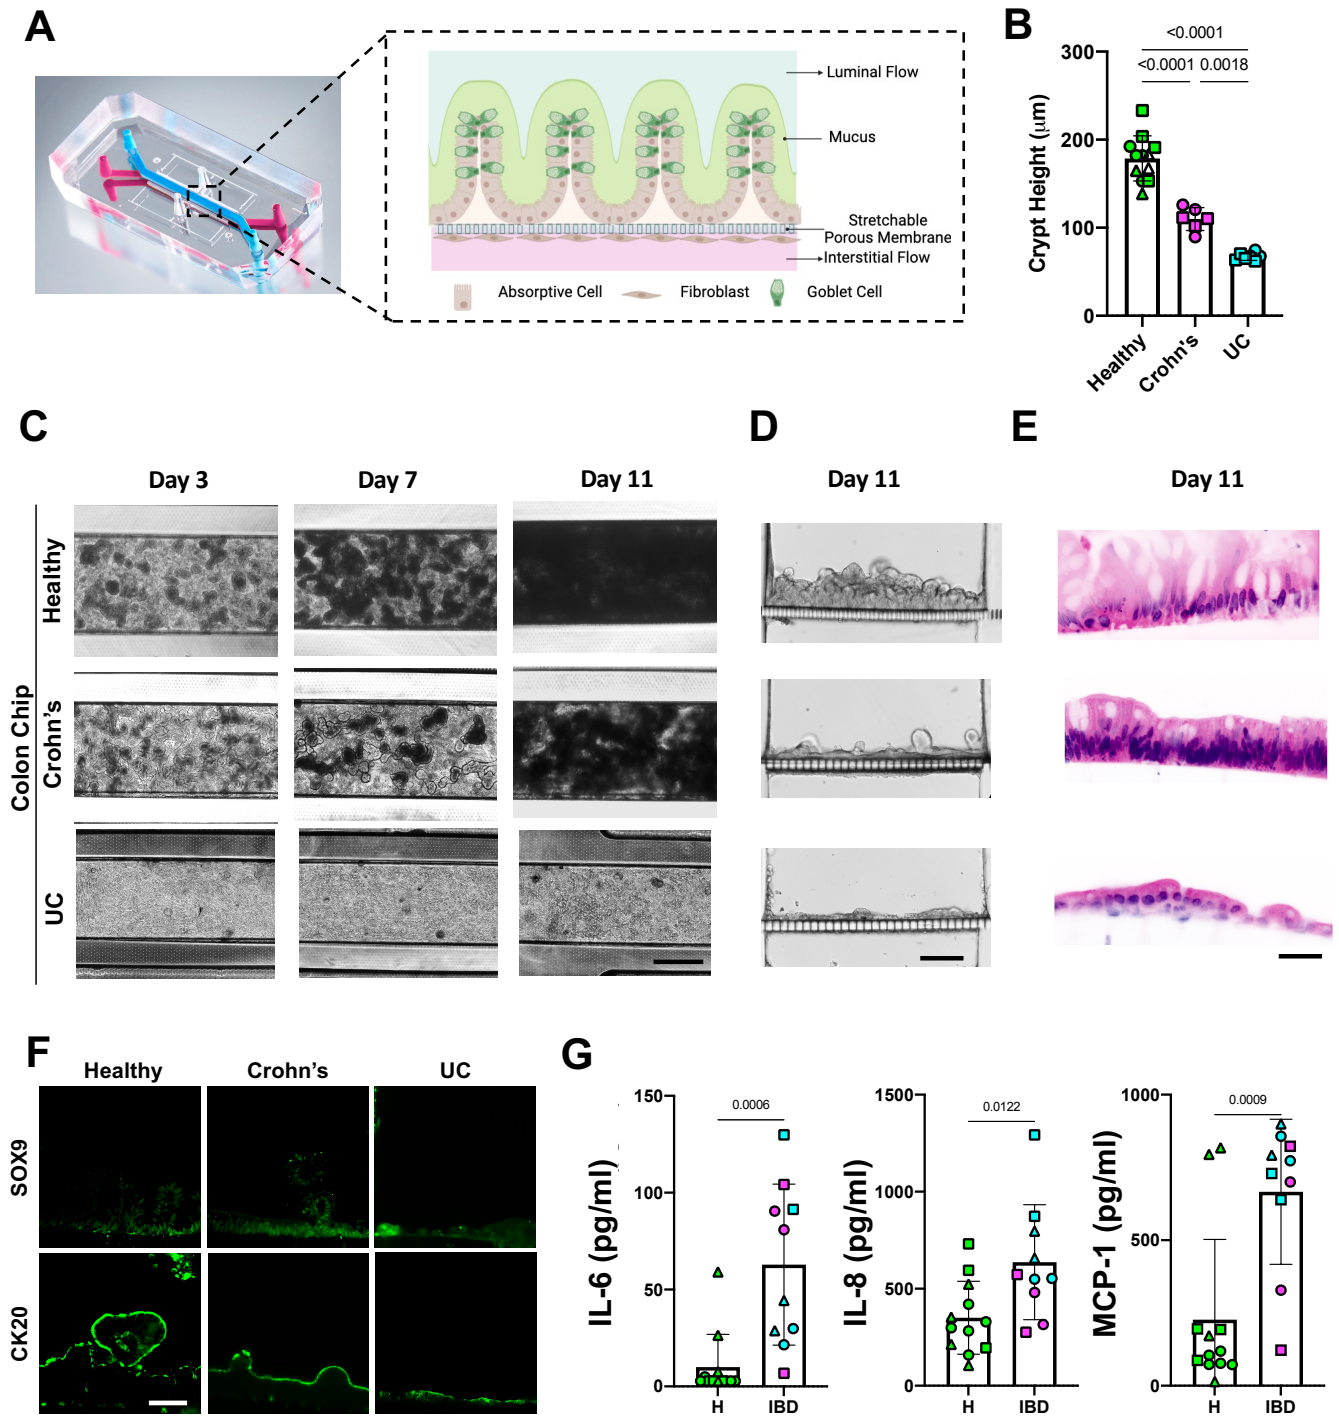

**Fig. 1**

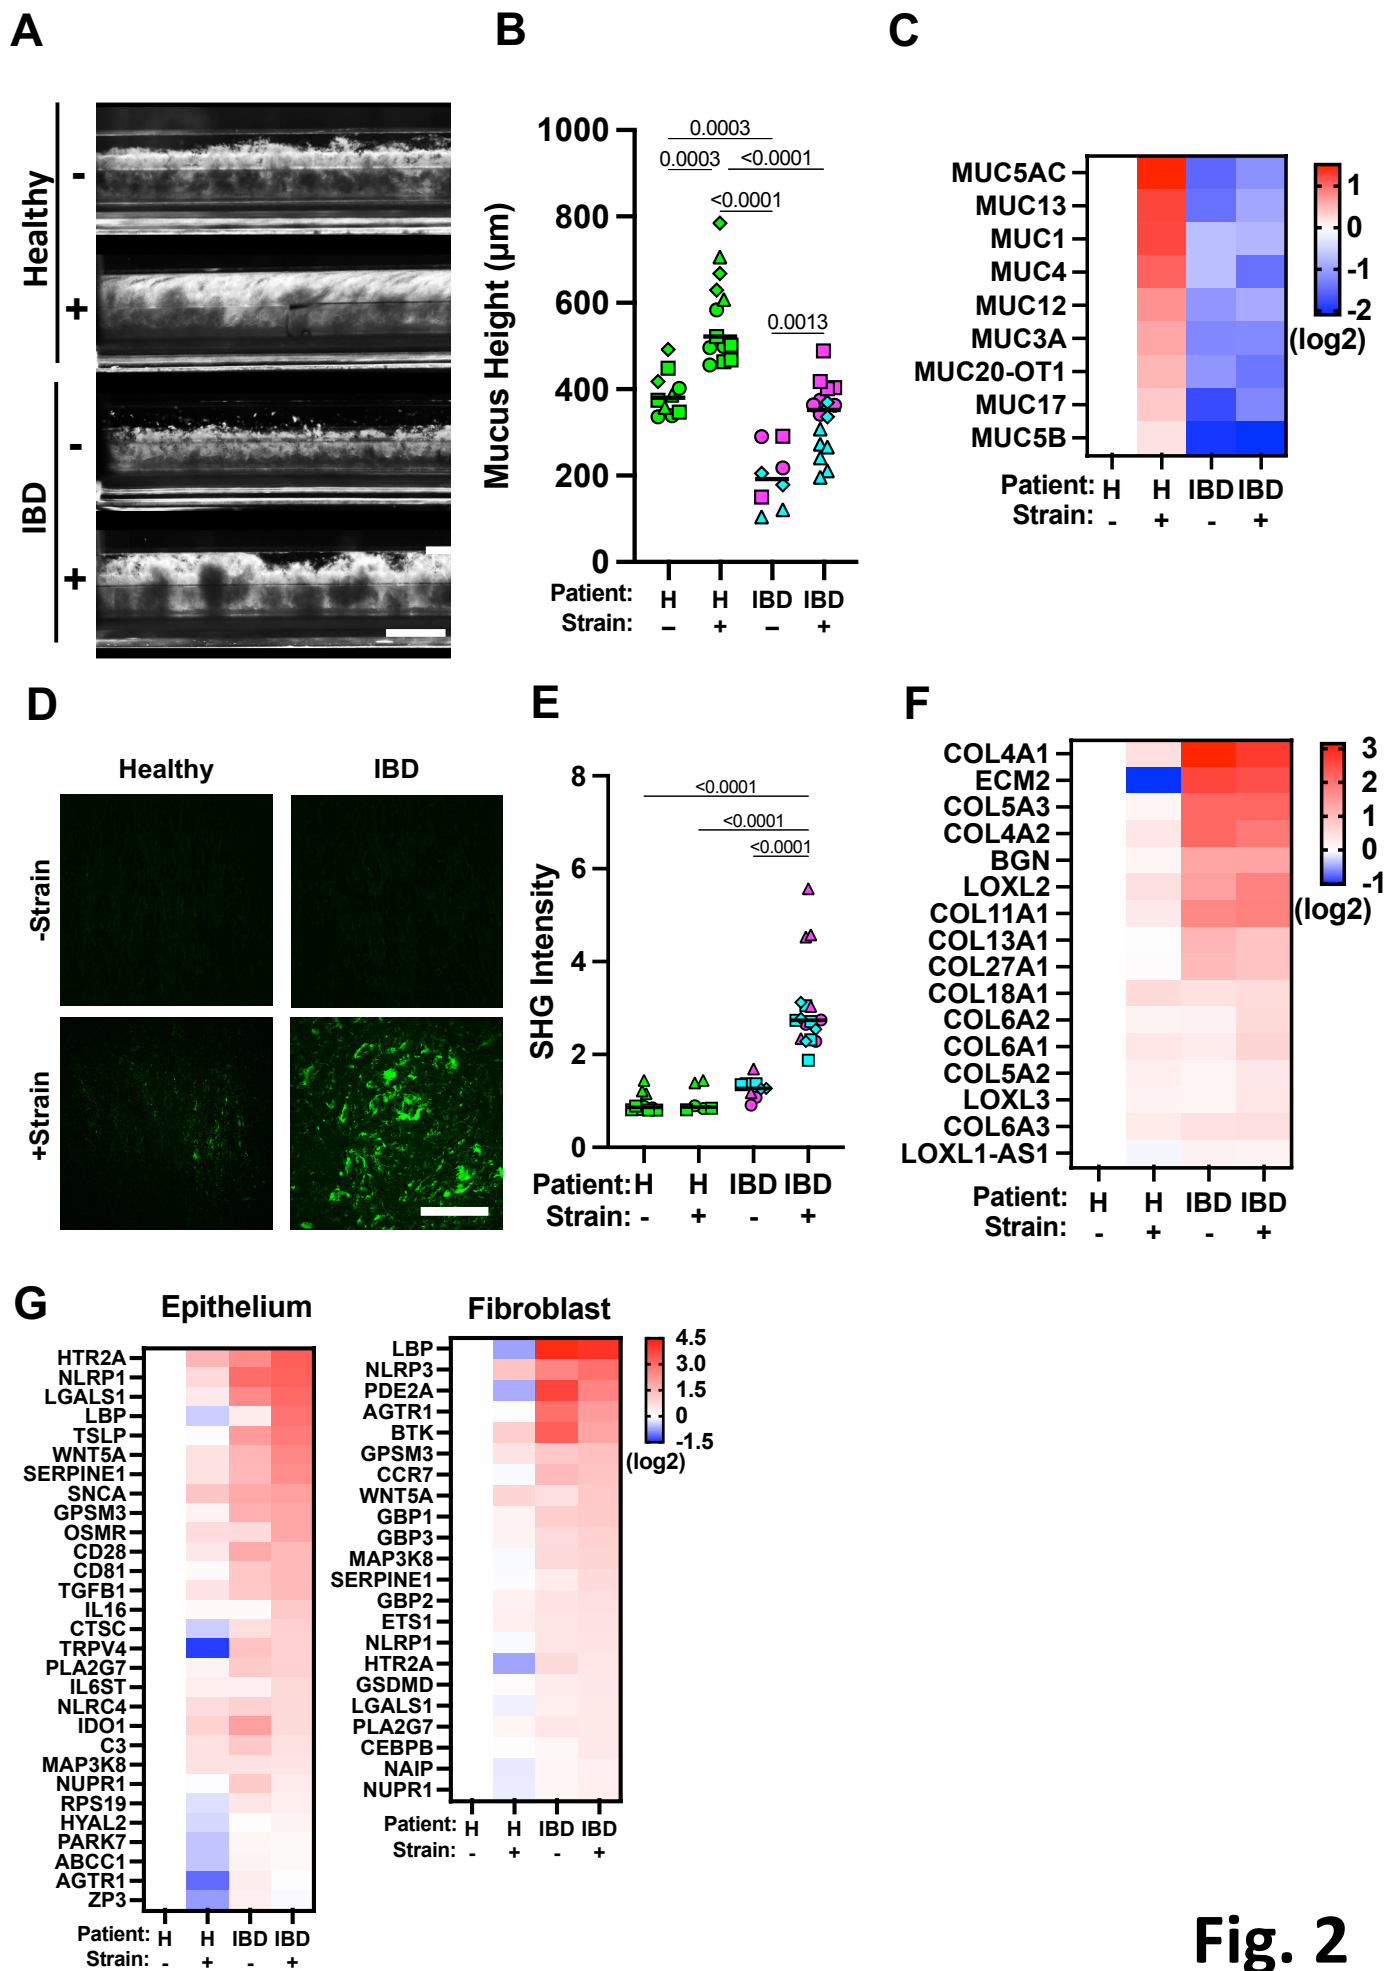

**Fig. 2**

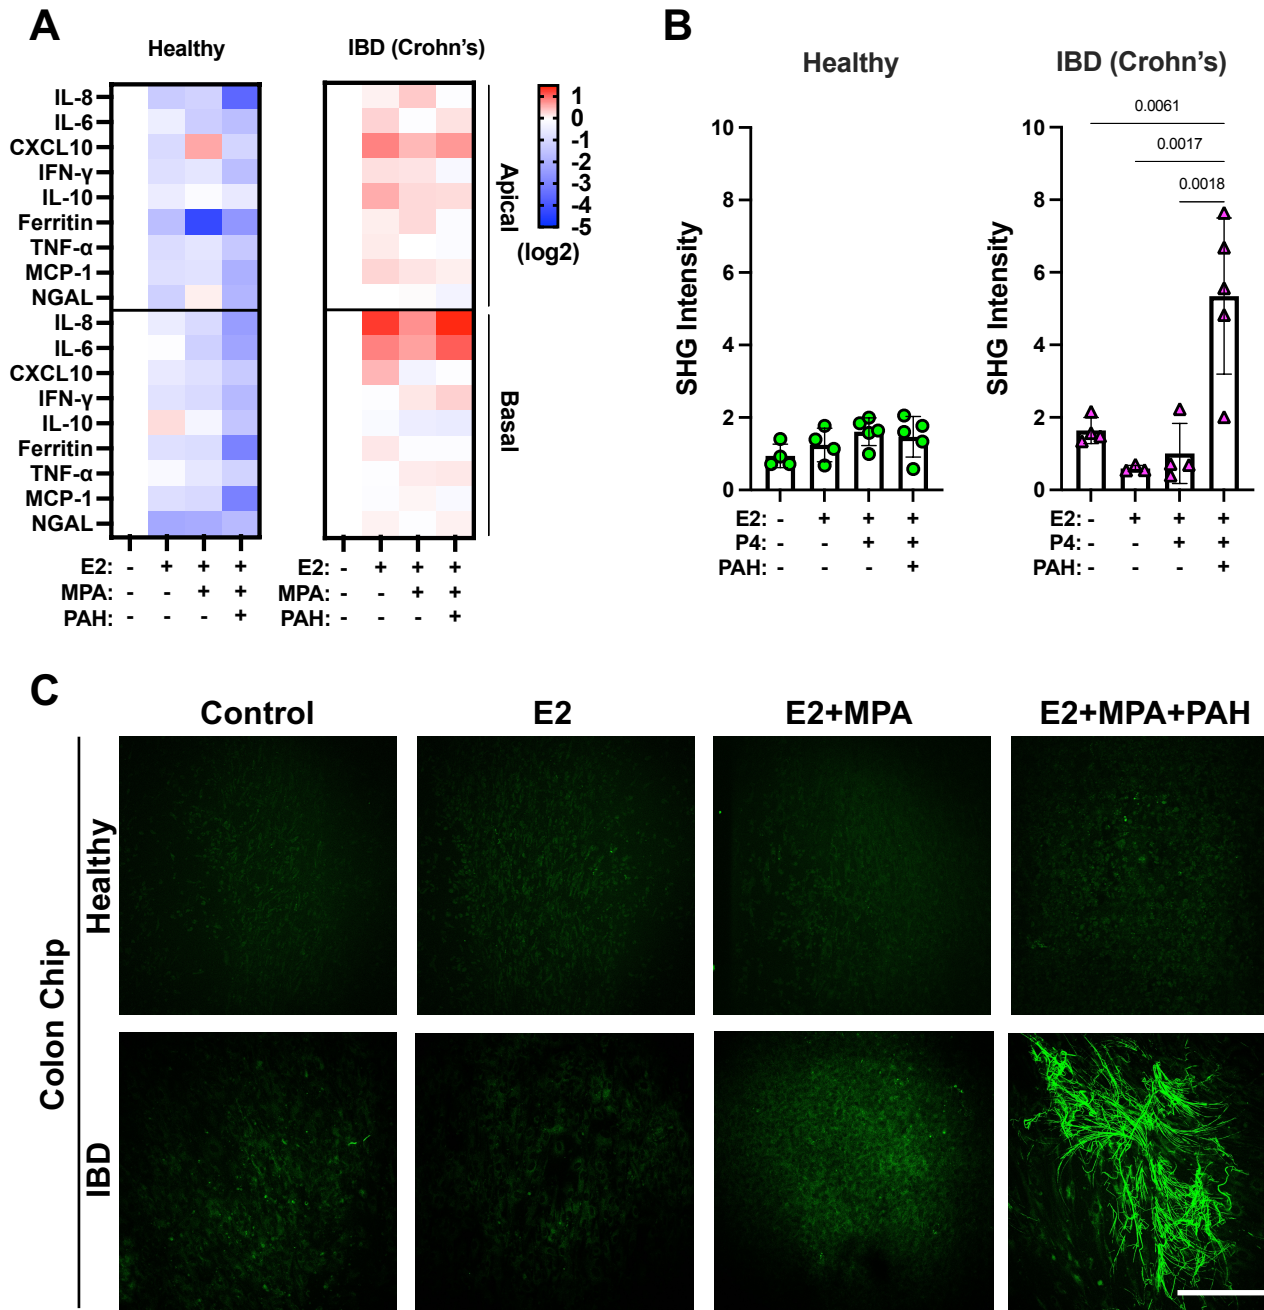

**Fig. 3**

**A**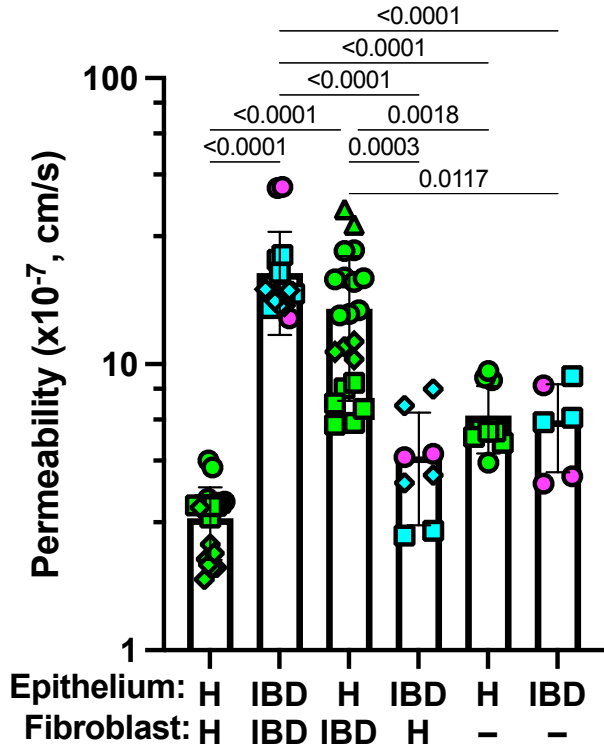**B**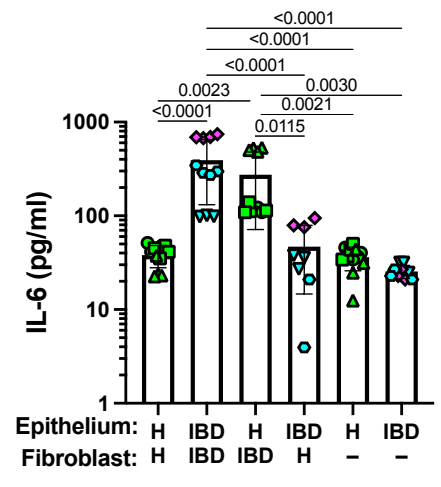**C**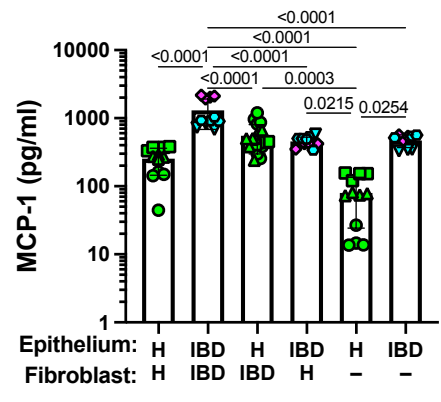**D**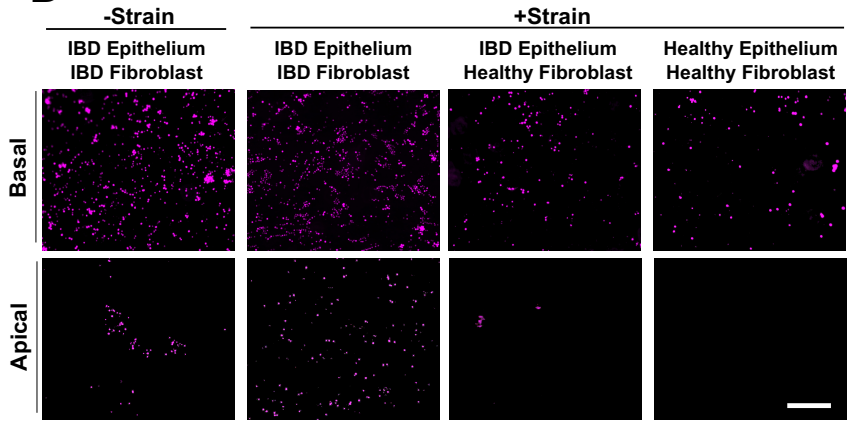**E**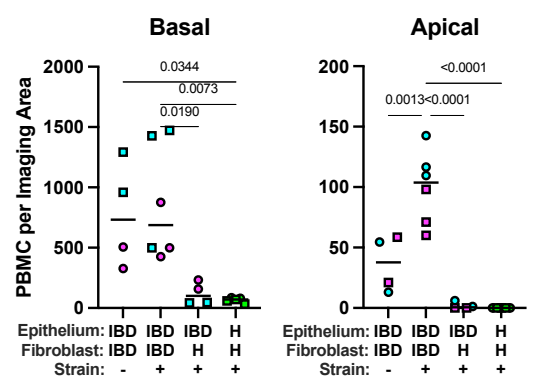**Fig. 4**

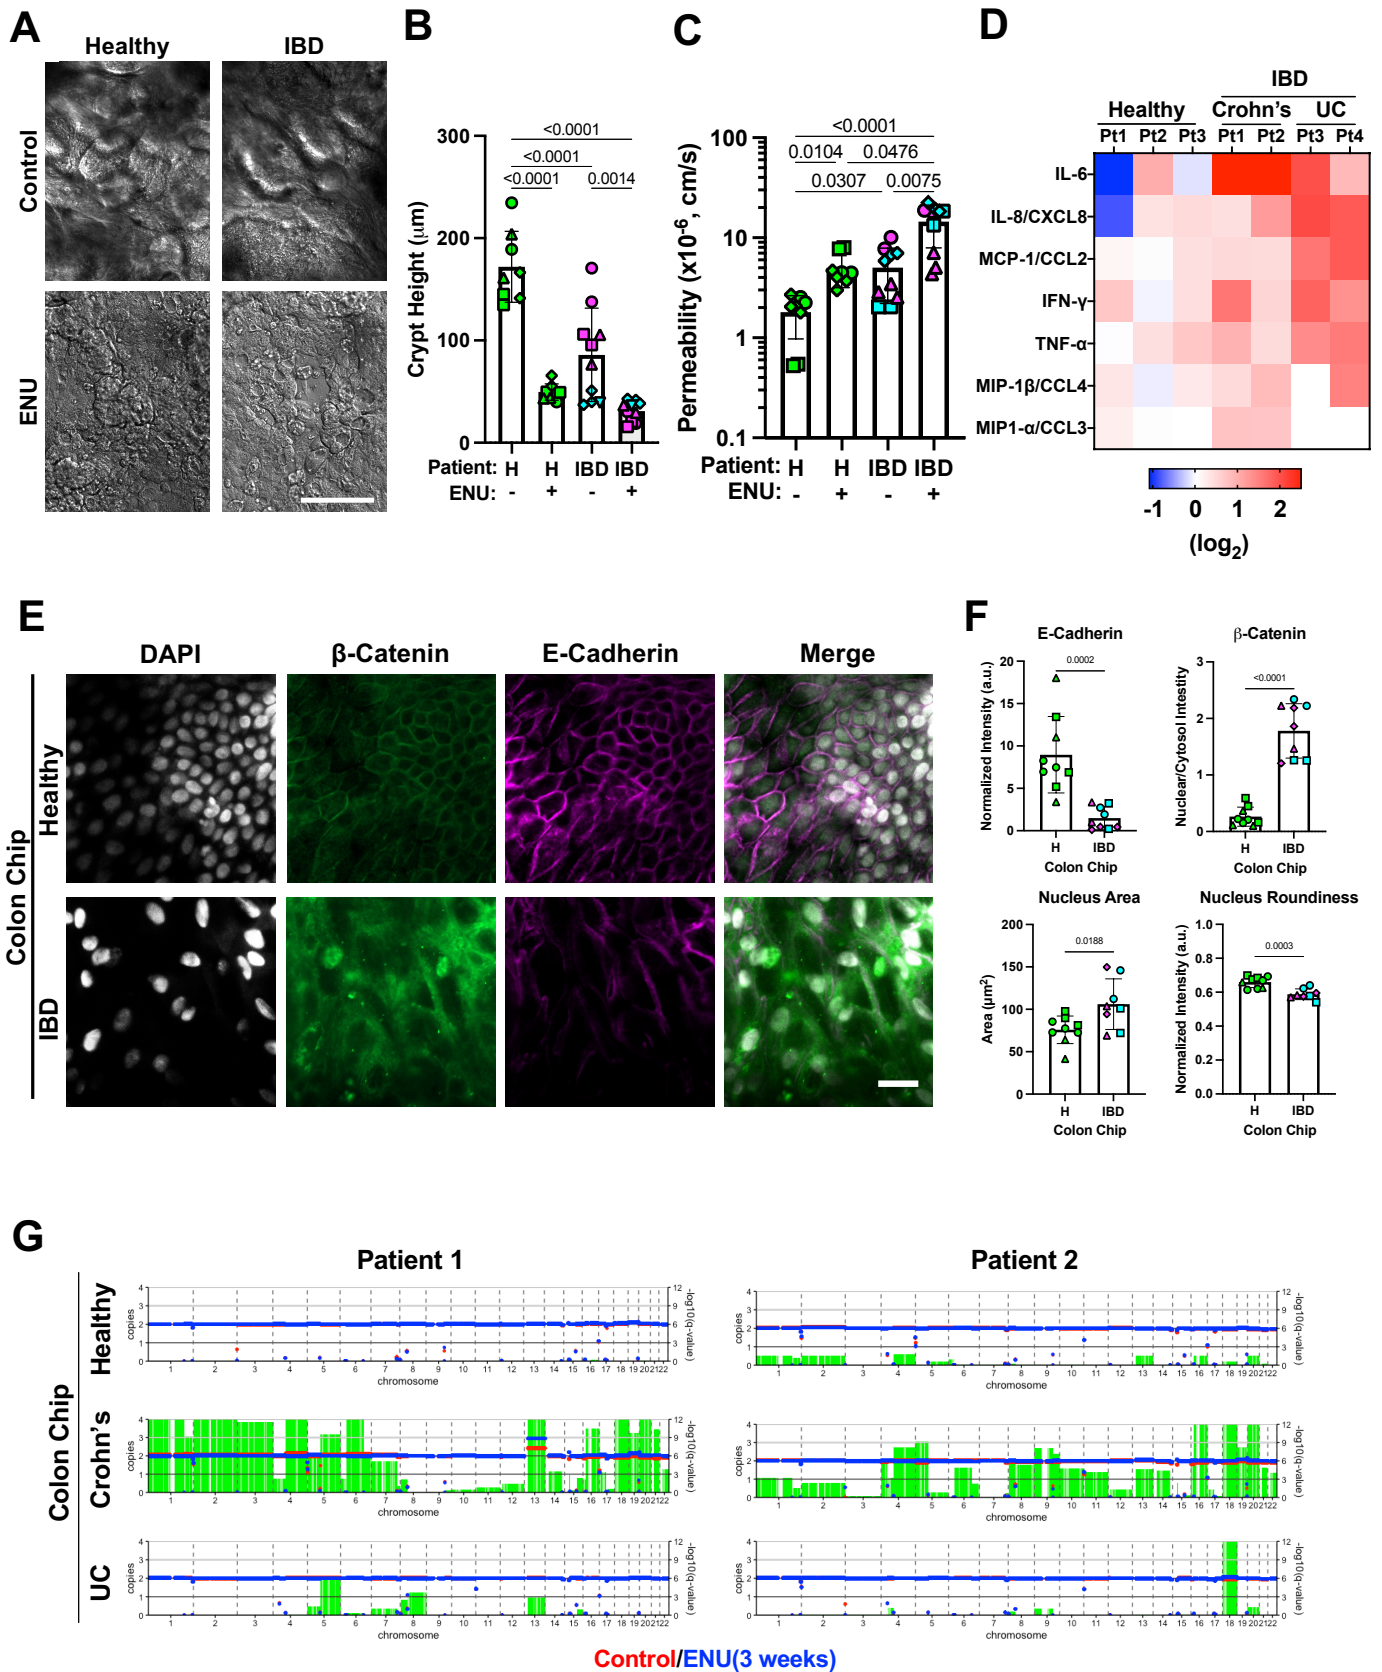

**Fig. 5**



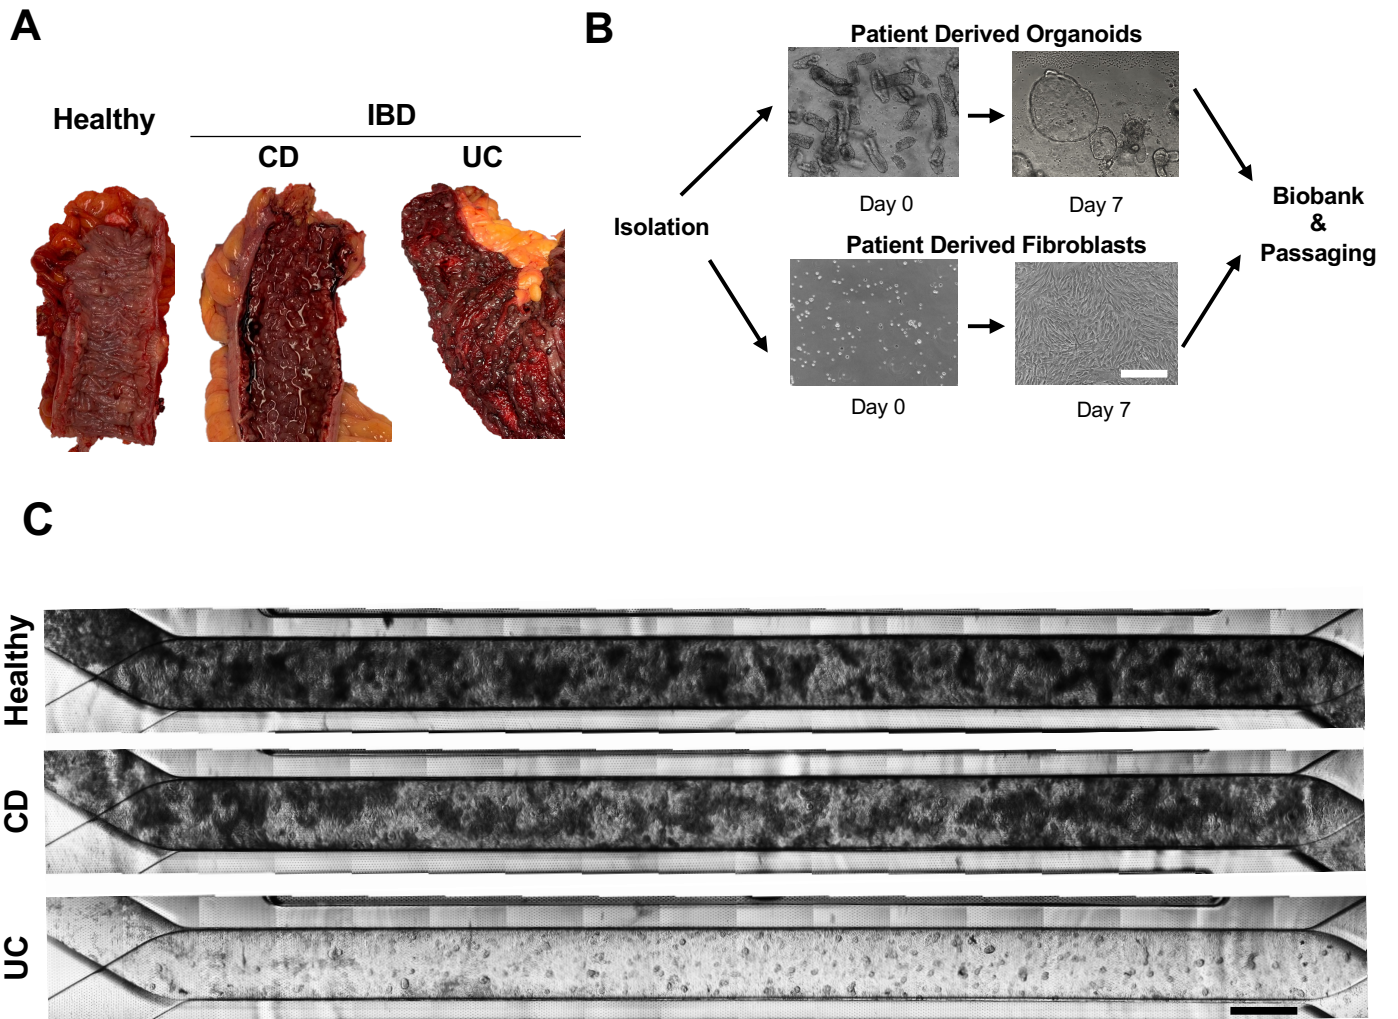

**Extended Data Fig. 1**

**A**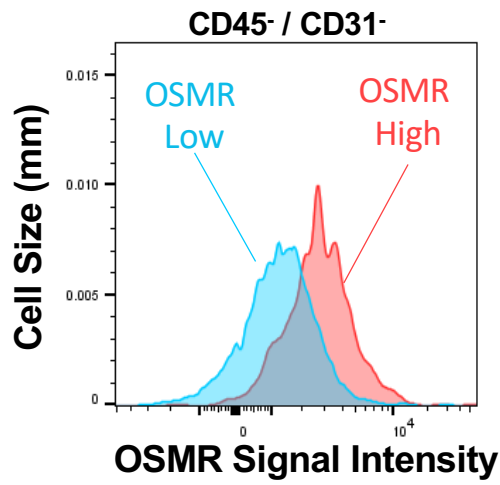**B**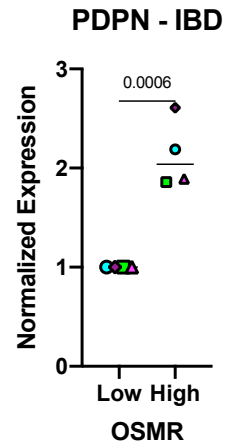**C**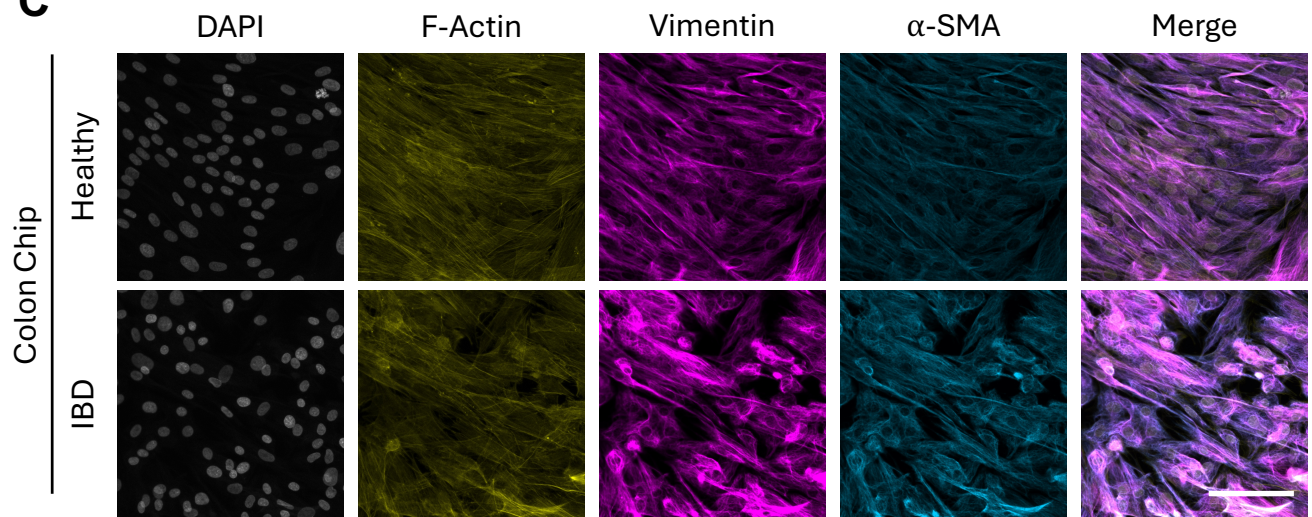**D**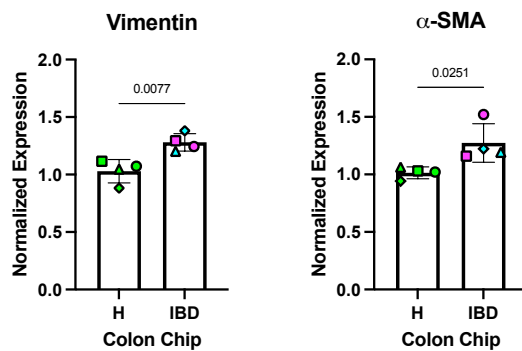

**A**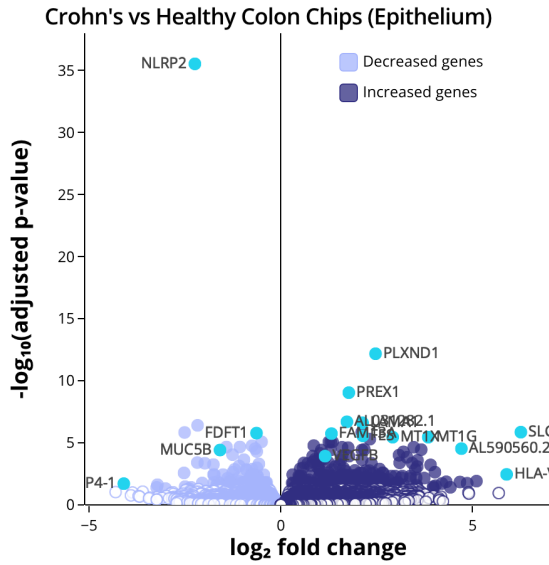**B**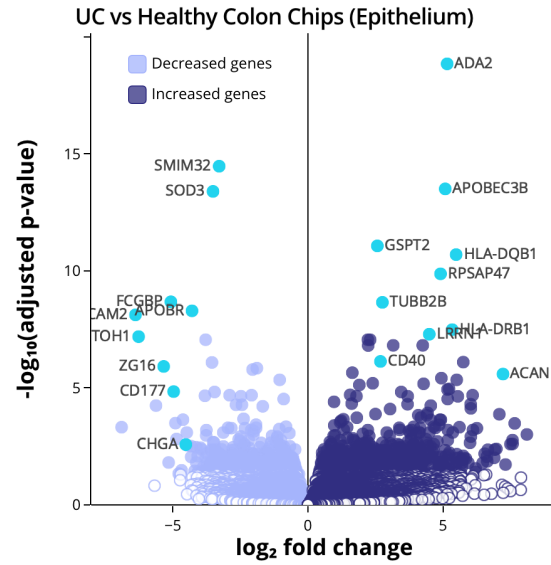**C**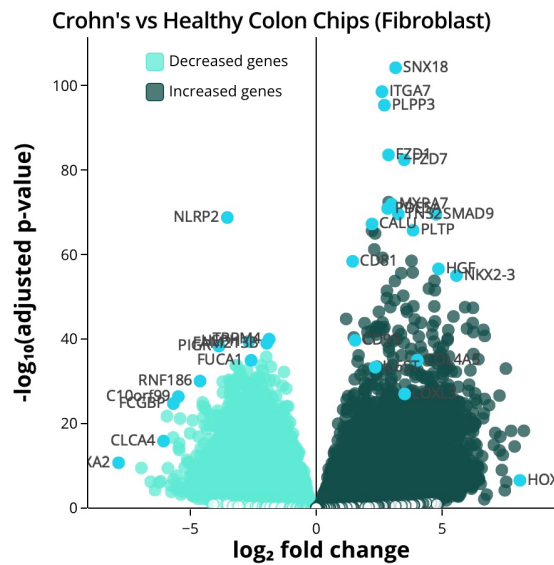**D**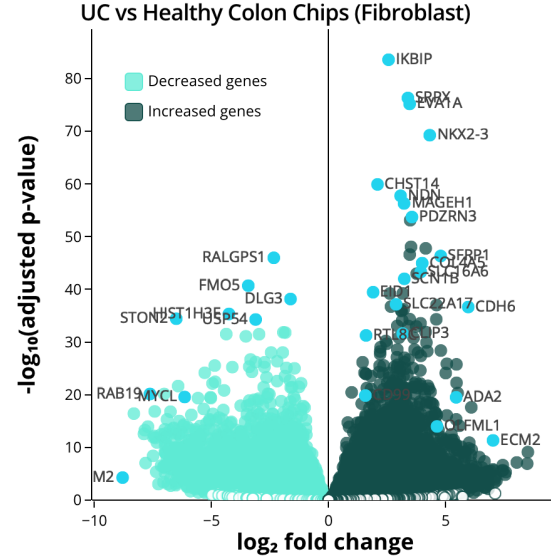

**A**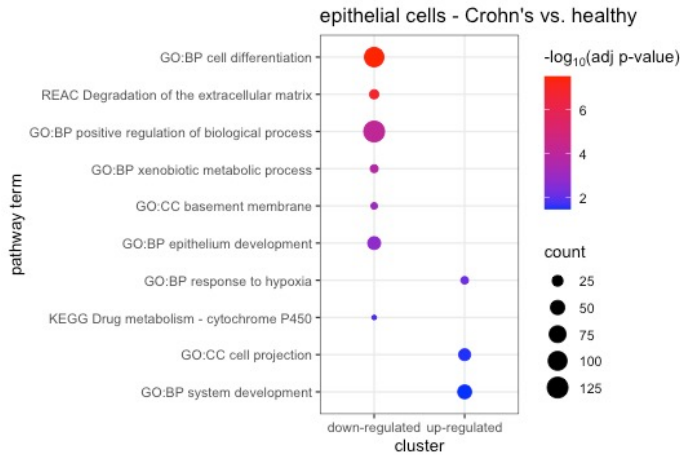**B**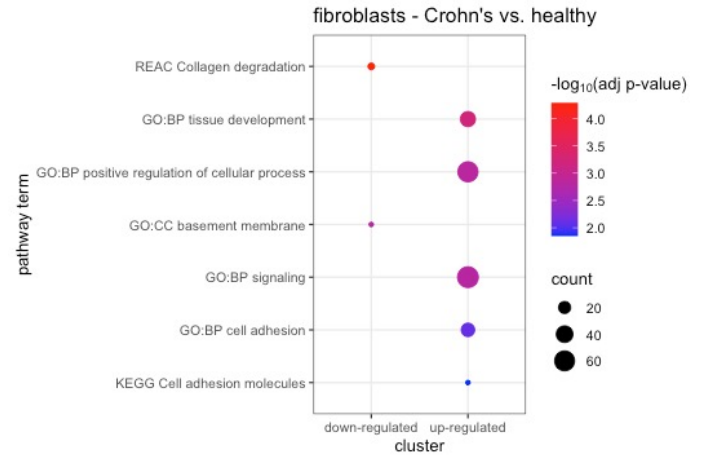**C**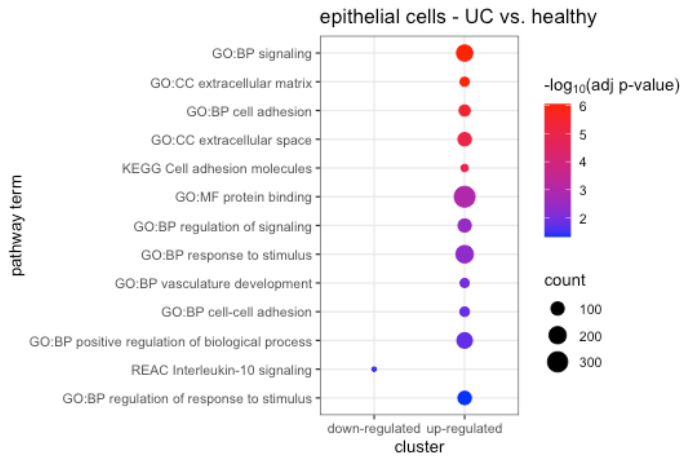**D**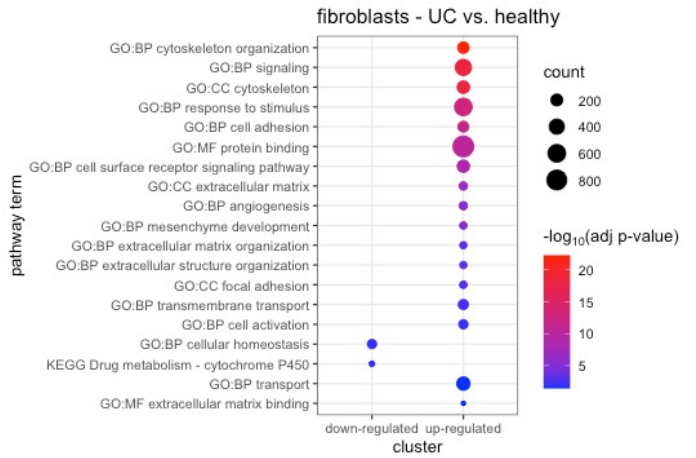

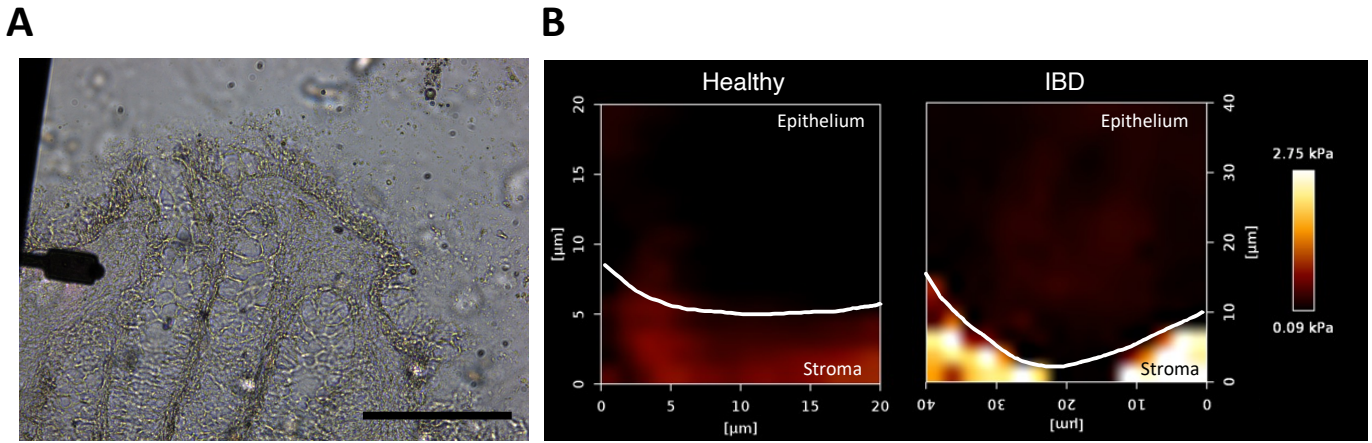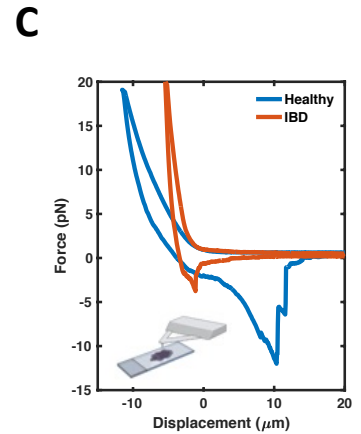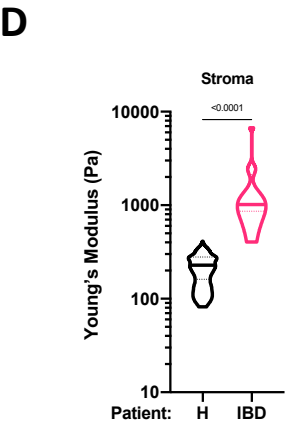

**Extended Data Fig. 5**

**A**

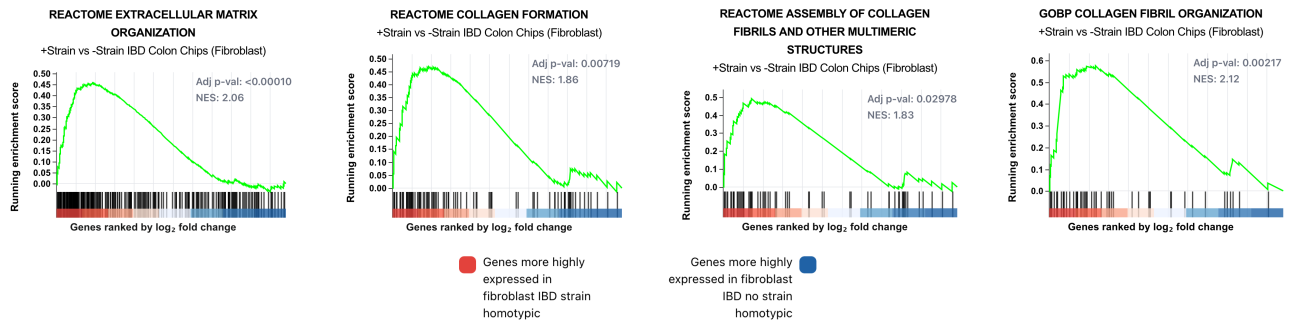

**B**

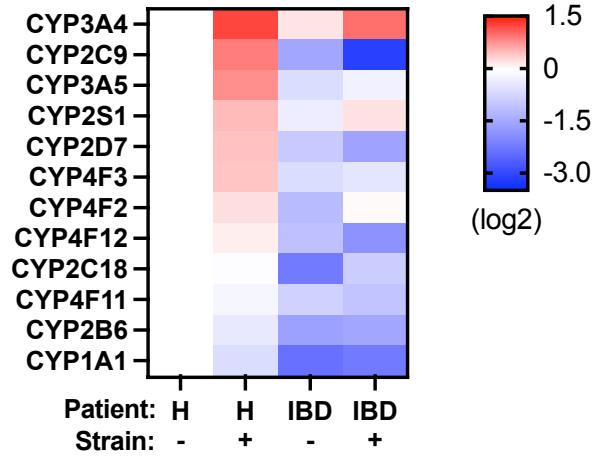

**A**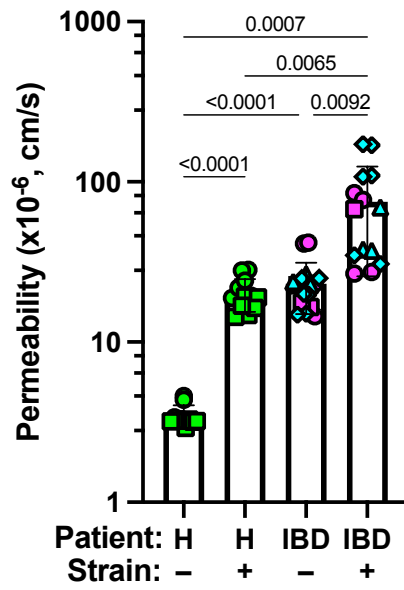**B**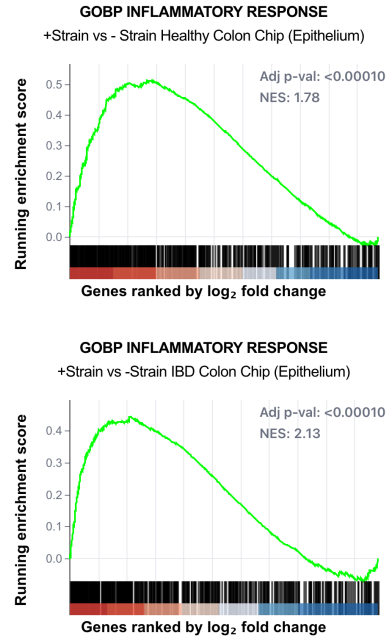

**A**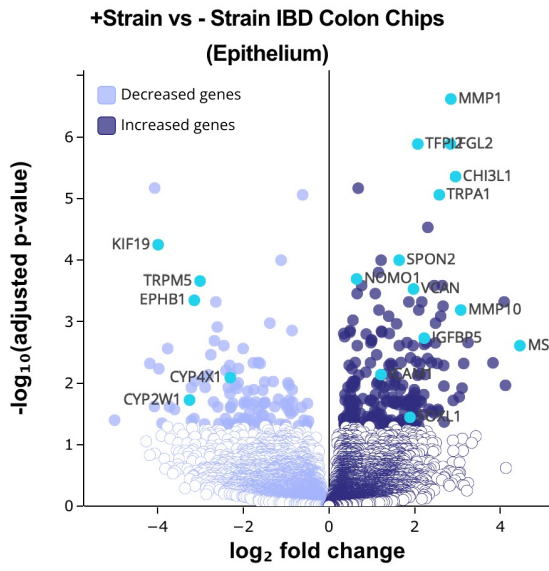**B**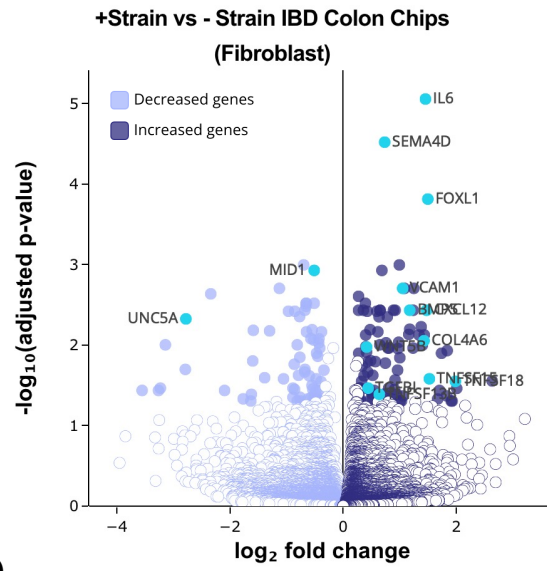**C**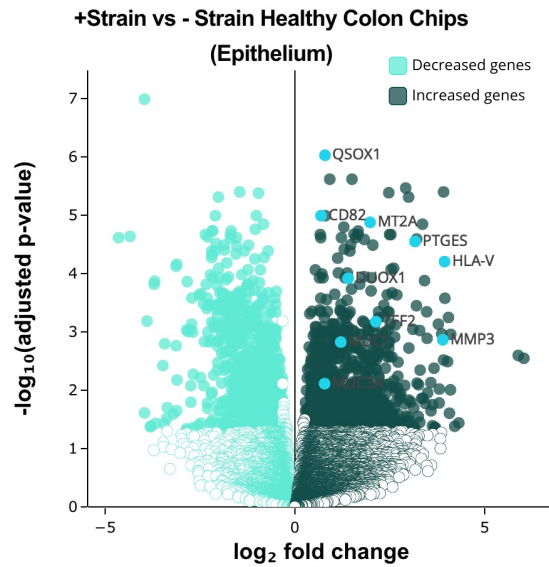**D**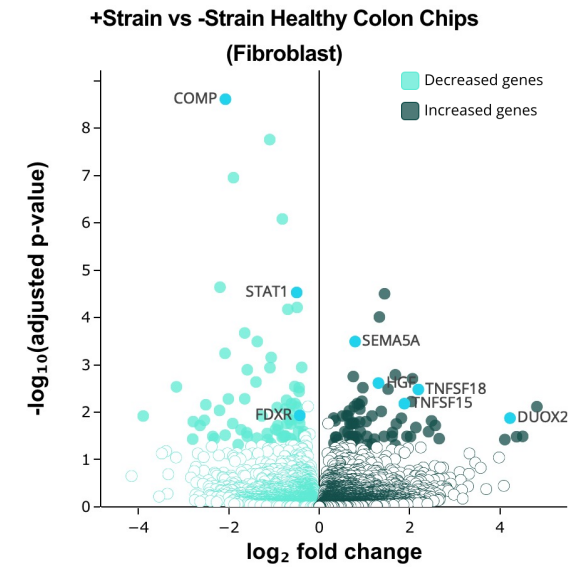



**A**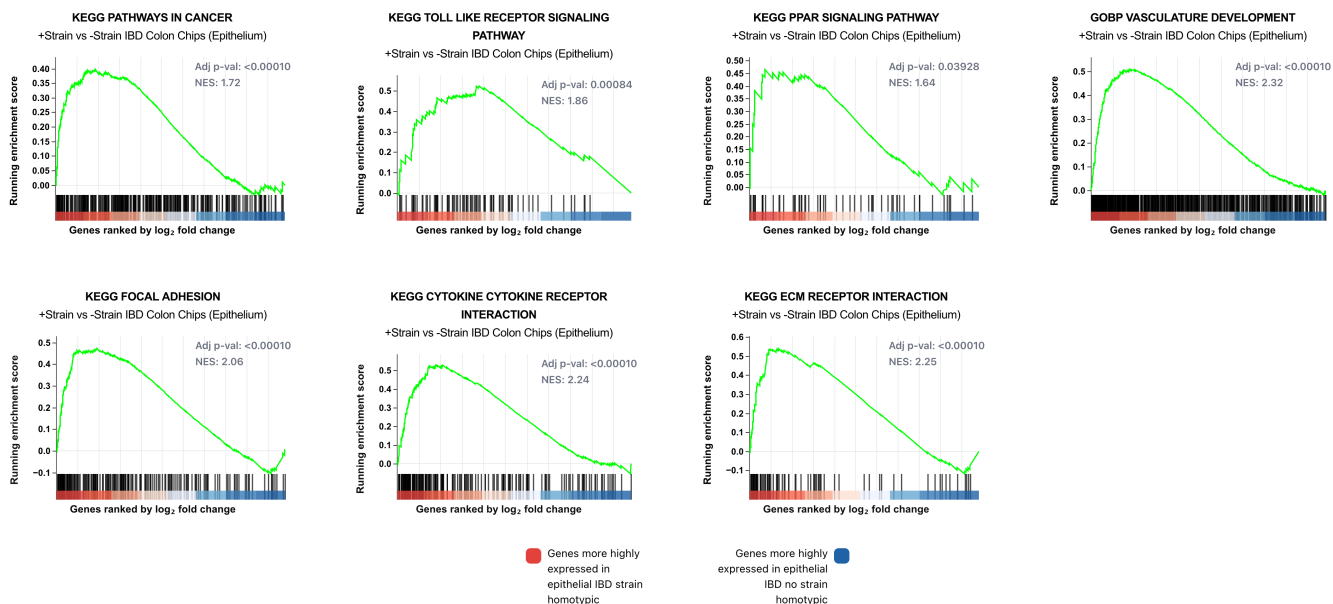**B**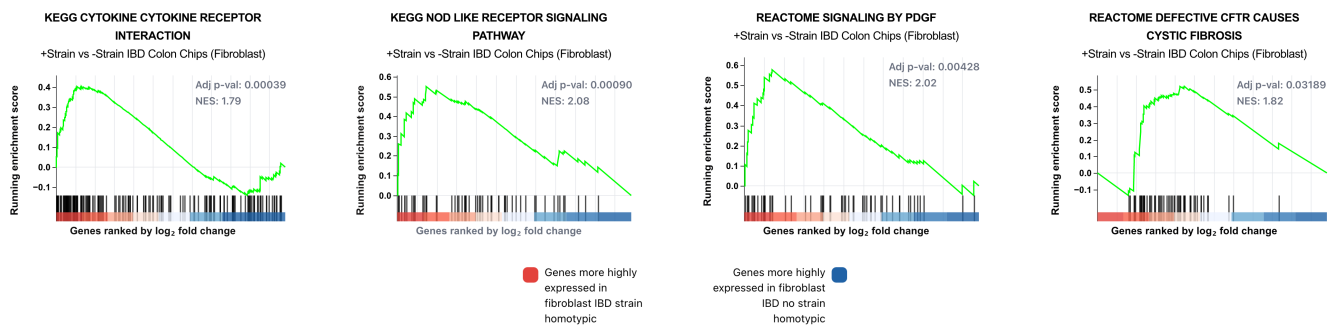

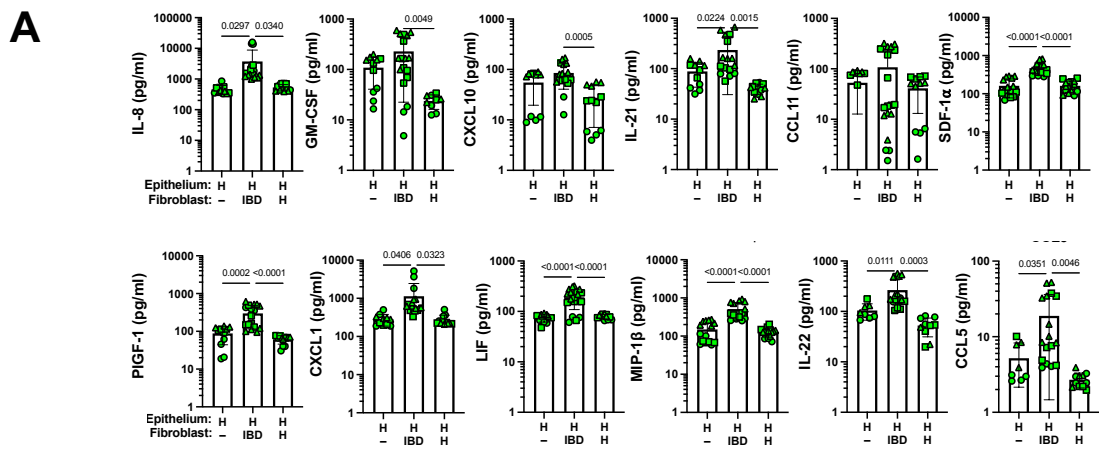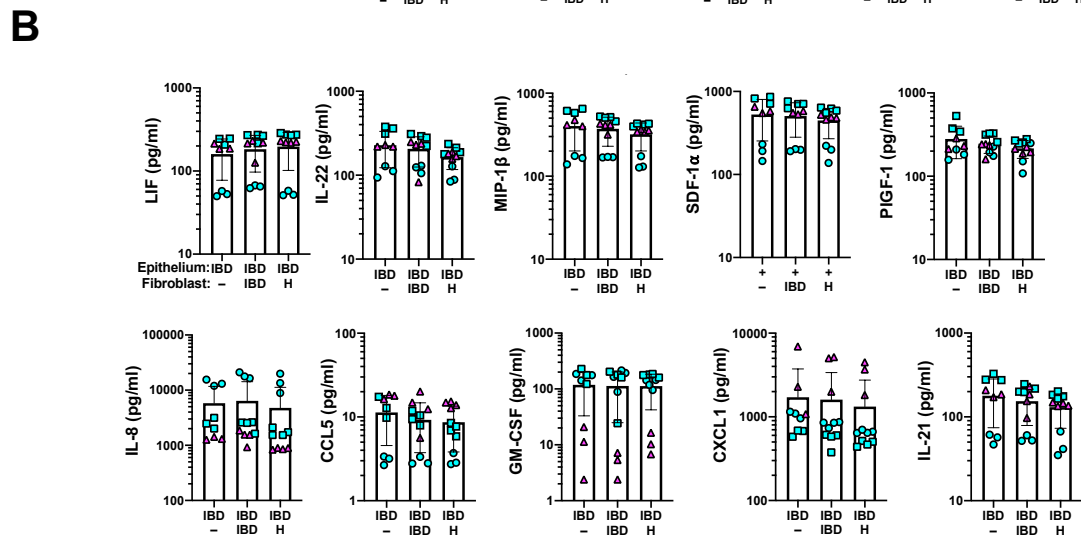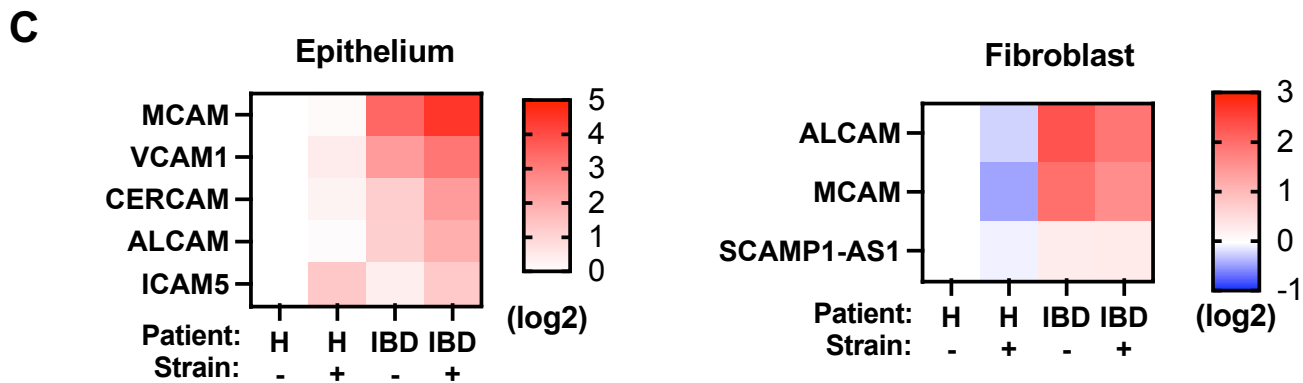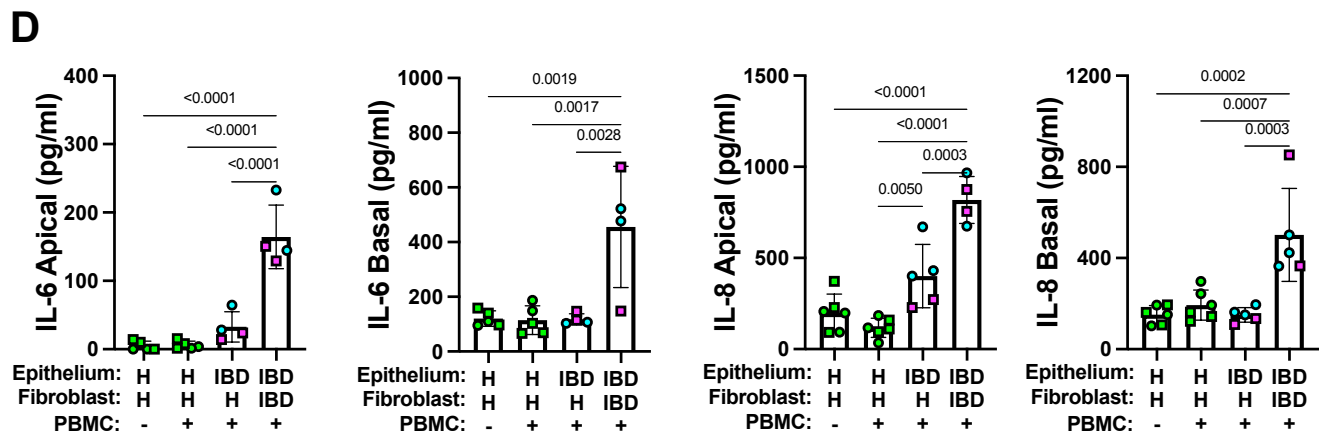

**Extended Data Fig. 10**
